# Supplementary material for: Naive Prediction of Protein Backbone Phi and Psi Dihedral Angles Using Deep Learning
Source: MDPI journal article supplement (doi:10.3390/molecules28207046), 2023-10-12
Supplement: s1 [file s1]

# Naive Prediction of Protein Backbone Phi and Psi Dihedral Angles Using Deep Learning

Matic Broz <sup>1</sup>, Marko Jukić <sup>1,2,3,\*</sup> and Urban Bren <sup>1,2,3,\*</sup>

<sup>1</sup> Faculty of Chemistry and Chemical Engineering, University of Maribor, Smetanova ulica 17, SI-2000 Maribor, Slovenia; matic.broz@um.si; marko.jukic@um.si; urban.bren@um.si;

<sup>2</sup> Faculty of Mathematics, Natural Sciences and Information Technologies, University of Primorska, Glagoljaška ulica 8, SI-6000 Koper, Slovenia;

<sup>3</sup> Institute of Environmental Protection and Sensors, Beloruska ulica 7, SI-2000 Maribor, Slovenia;

\* To whom the correspondence should be addressed; marko.jukic@um.si and urban.bren@um.si

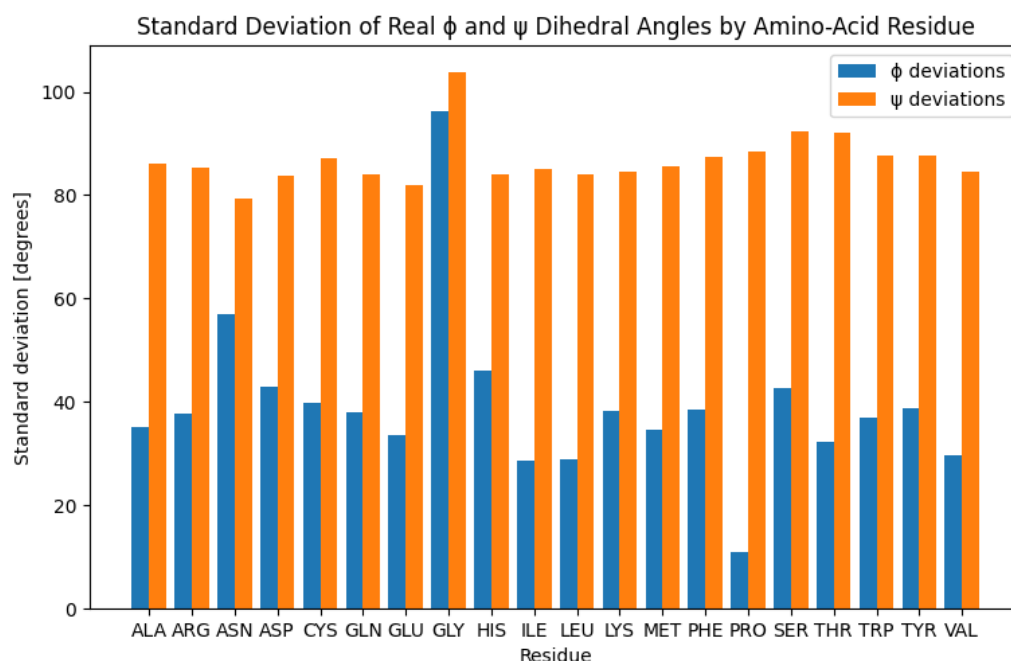

**Figure S1.** A bar graph of standard deviations of real  $\phi$  and  $\psi$  angles in the entire dataset by amino-acid residue.

**Table S1.** Exact values of standard deviations of real  $\phi$  and  $\psi$  angles in the train and test datasets.

| Amino-acid residue | $\phi$       | $\psi$        |
|--------------------|--------------|---------------|
| ALA                | 35.60        | 86.03         |
| ARG                | 38.43        | 85.36         |
| ASN                | 57.24        | 79.45         |
| ASP                | 43.04        | 82.89         |
| CYS                | 40.57        | 87.62         |
| GLN                | 37.42        | 84.01         |
| GLU                | 33.40        | 81.83         |
| GLY                | <b>96.21</b> | <b>103.41</b> |
| HIS                | 45.06        | 84.18         |
| ILE                | 28.64        | 85.19         |
| LEU                | 28.90        | 84.04         |
| LYS                | 38.09        | 84.24         |

|            |              |       |
|------------|--------------|-------|
| <b>MET</b> | 34.79        | 85.69 |
| <b>PHE</b> | 38.23        | 87.17 |
| <b>PRO</b> | <b>10.93</b> | 88.23 |
| <b>SER</b> | 42.12        | 92.21 |
| <b>THR</b> | 31.99        | 92.51 |
| <b>TRP</b> | 36.87        | 87.83 |
| <b>TYR</b> | 38.62        | 87.47 |
| <b>VAL</b> | 29.85        | 84.83 |

MAE of  $\phi$  prediction based residue in relation to the -10 residue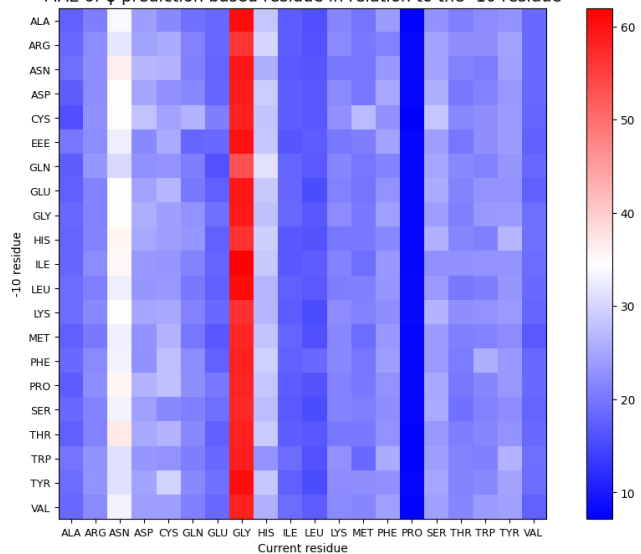MAE of  $\psi$  prediction based residue in relation to the -10 residue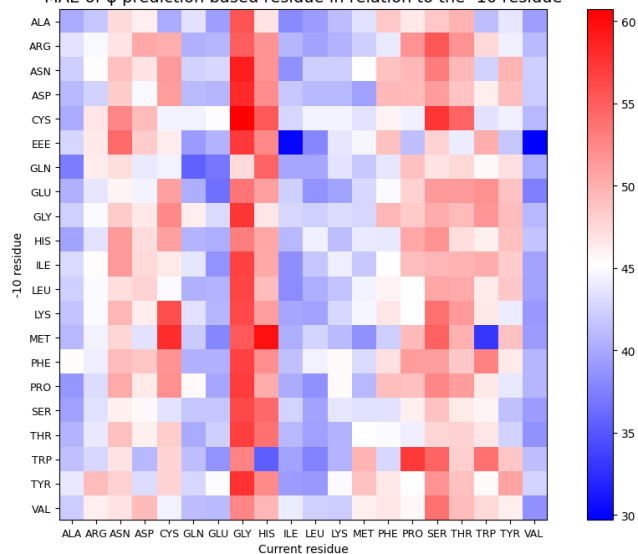MAE of  $\phi$  prediction based residue in relation to the -9 residue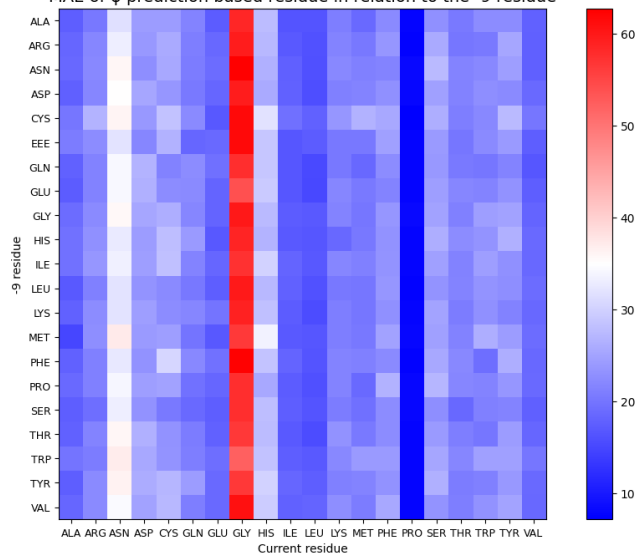MAE of  $\psi$  prediction based residue in relation to the -9 residue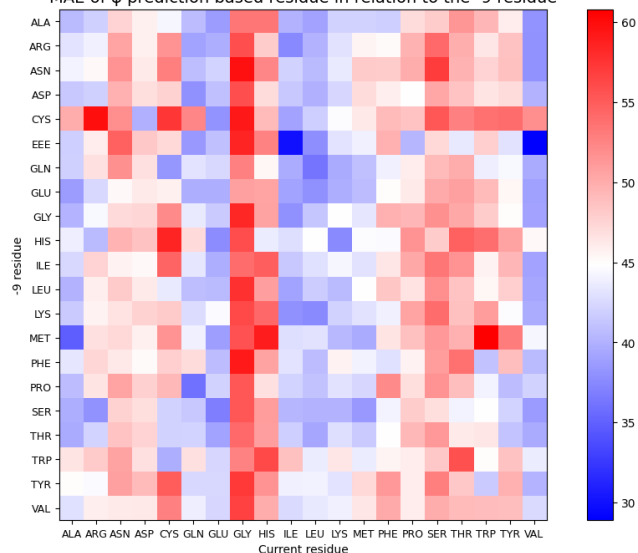

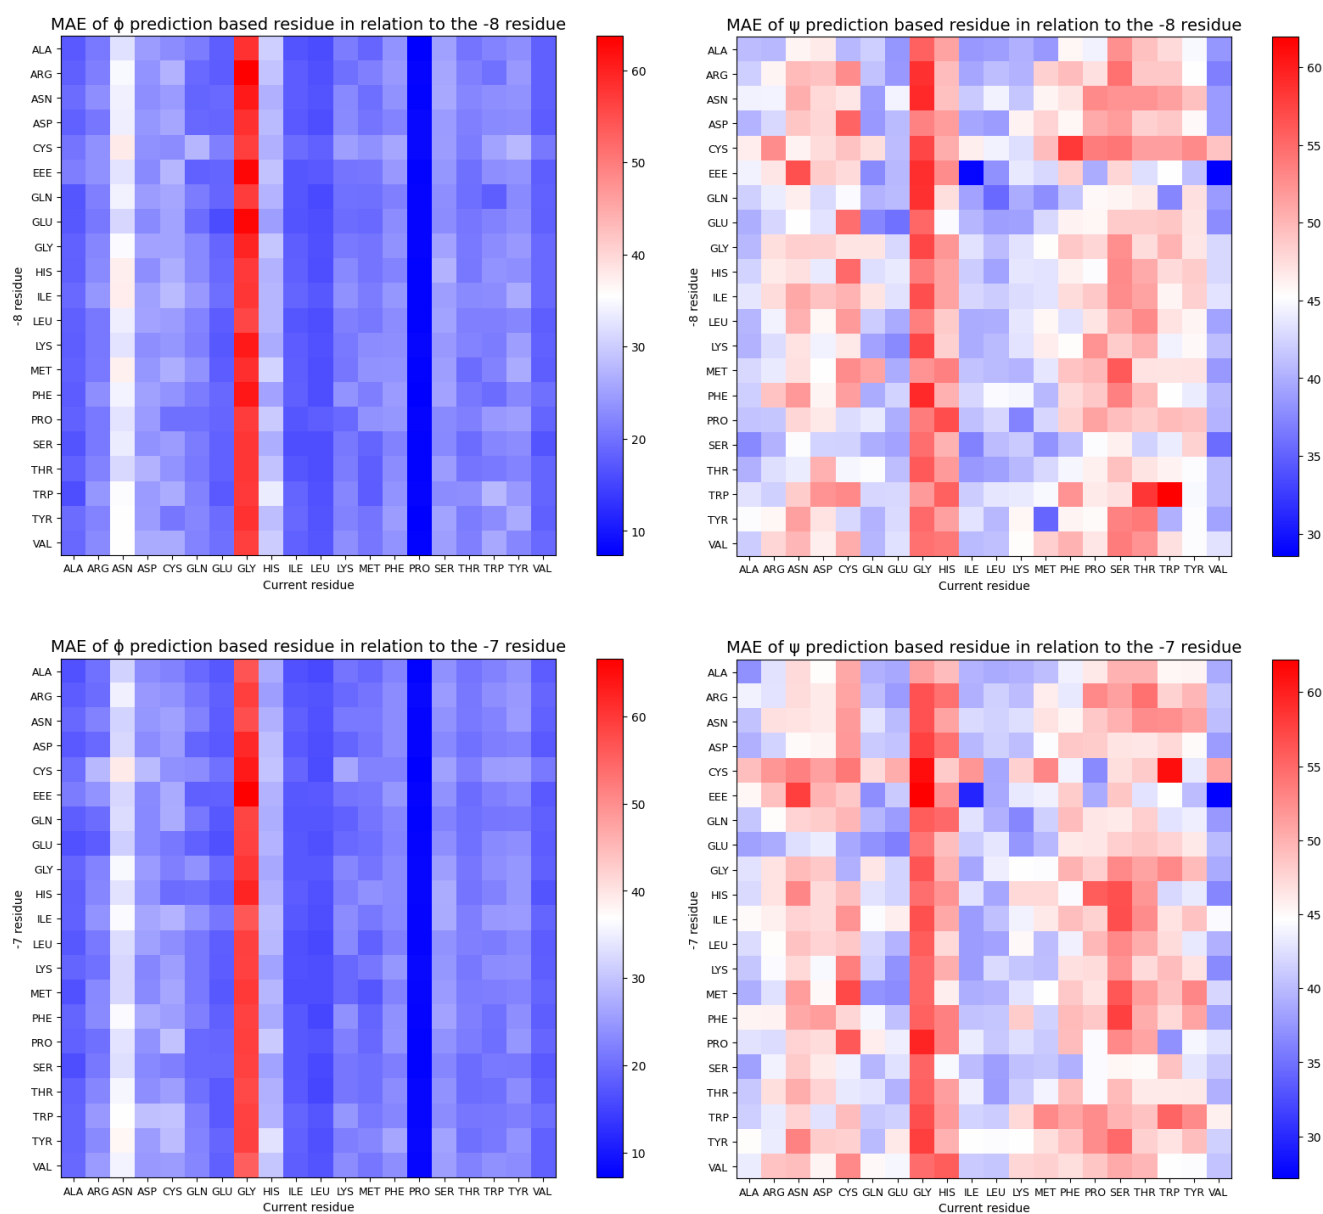

MAE of  $\phi$  prediction based residue in relation to the -6 residue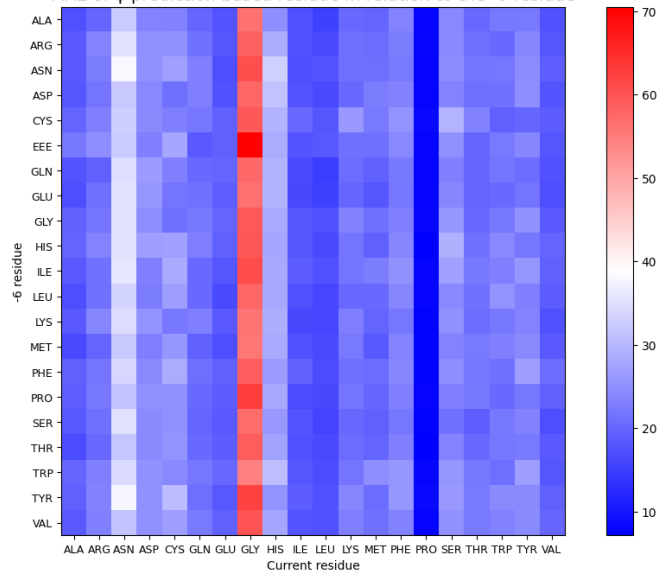MAE of  $\psi$  prediction based residue in relation to the -6 residue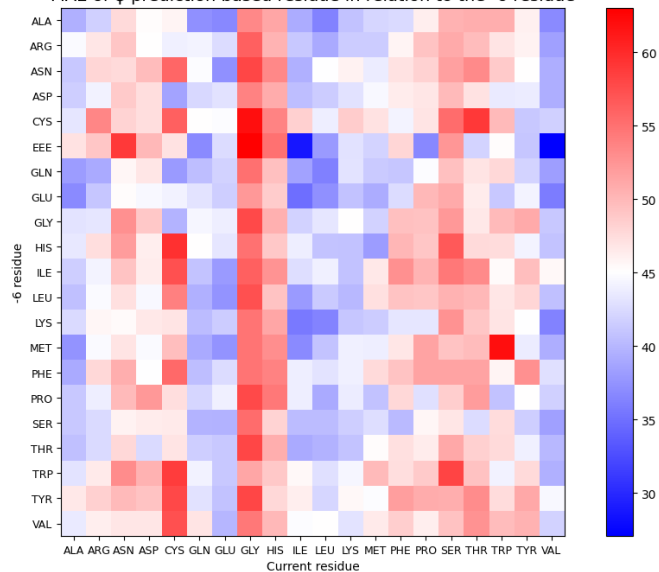MAE of  $\phi$  prediction based residue in relation to the -5 residue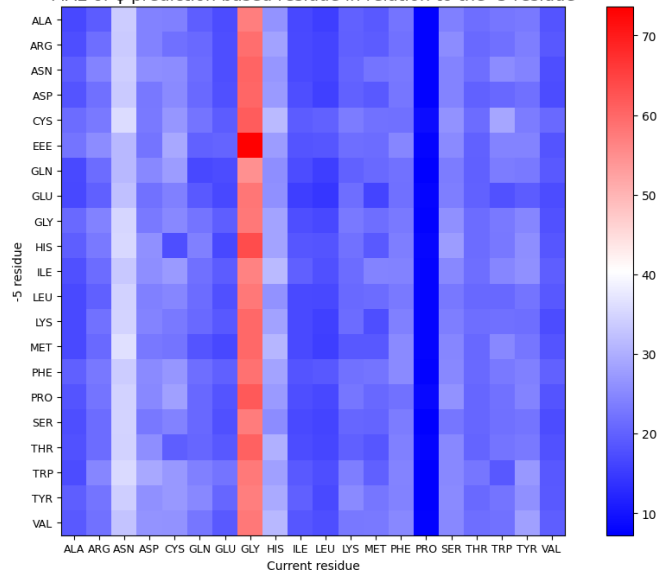MAE of  $\psi$  prediction based residue in relation to the -5 residue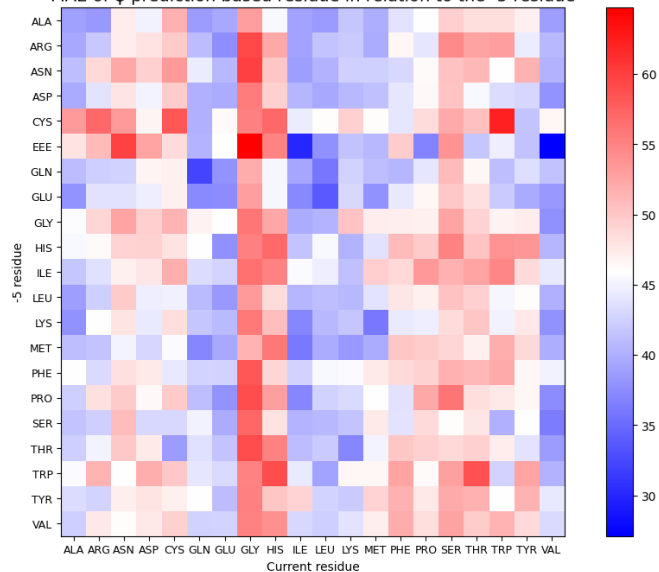

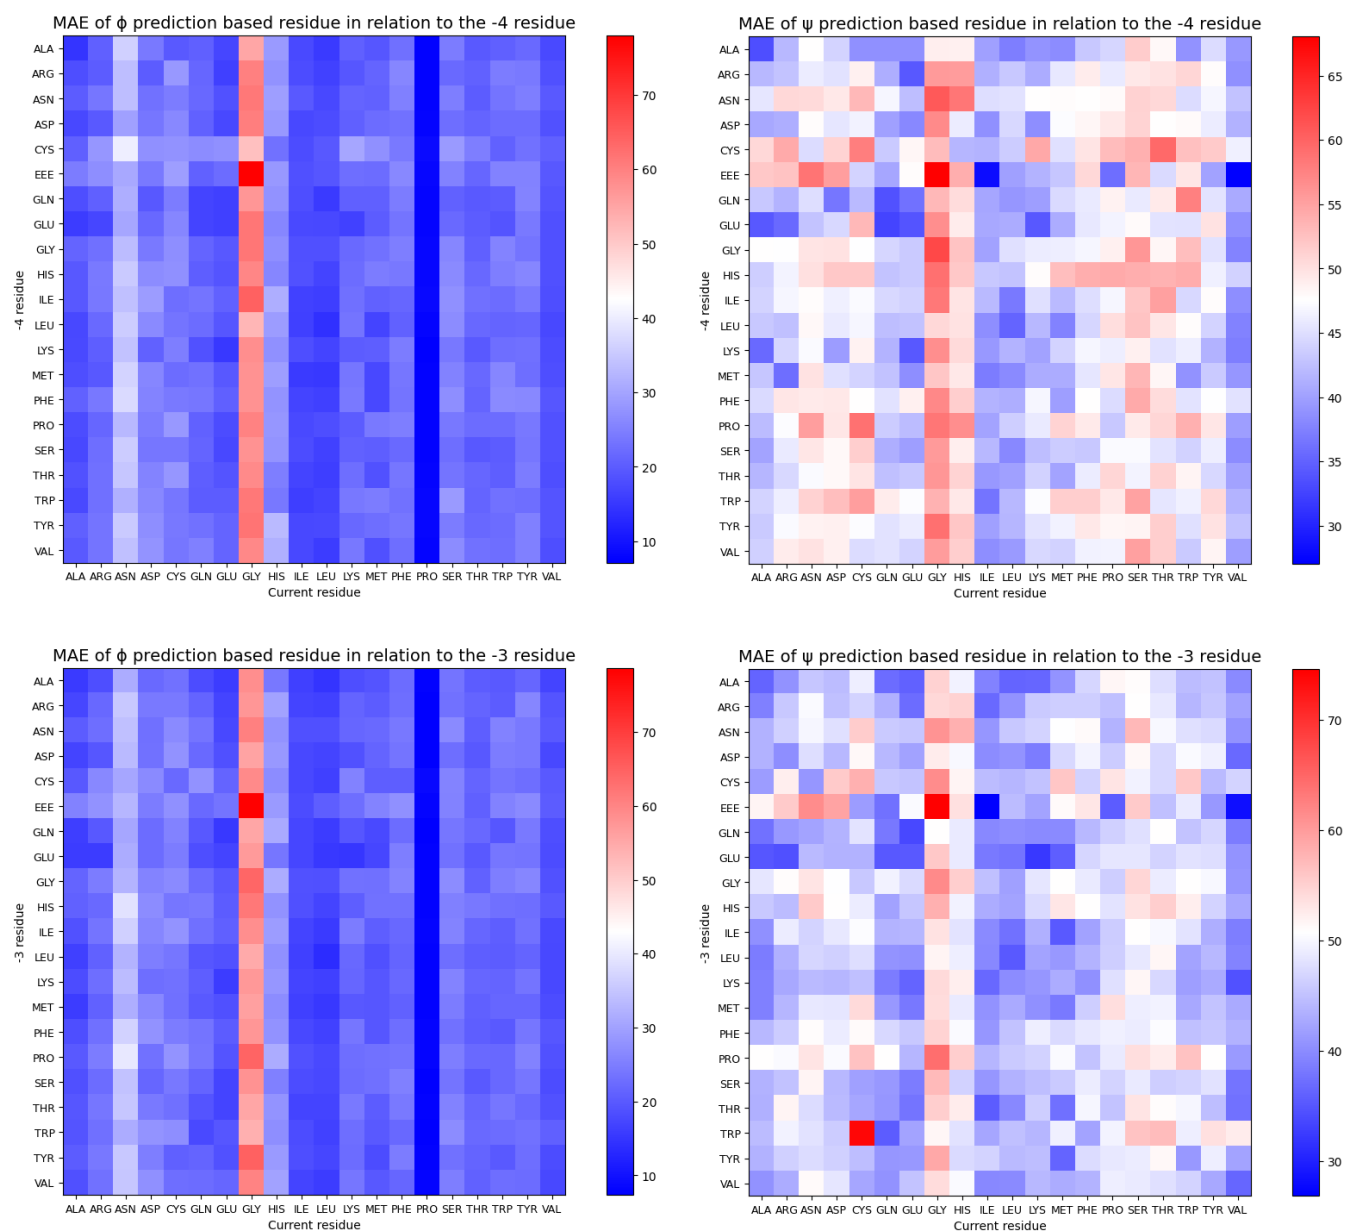

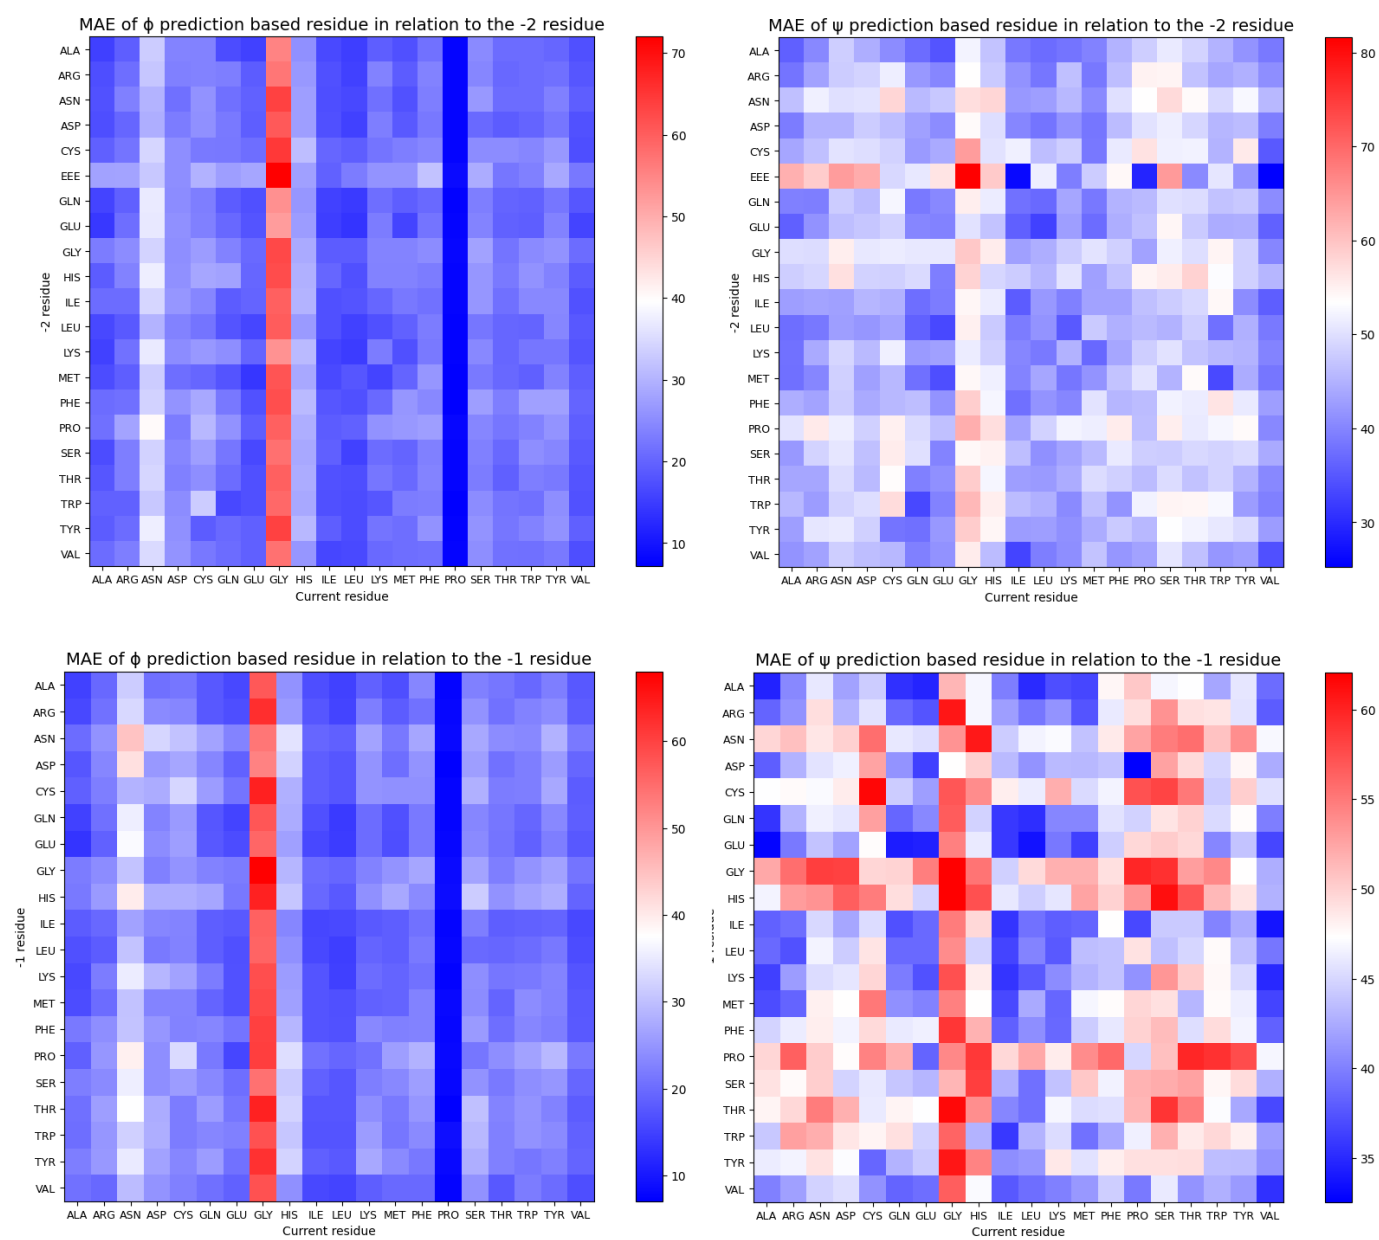

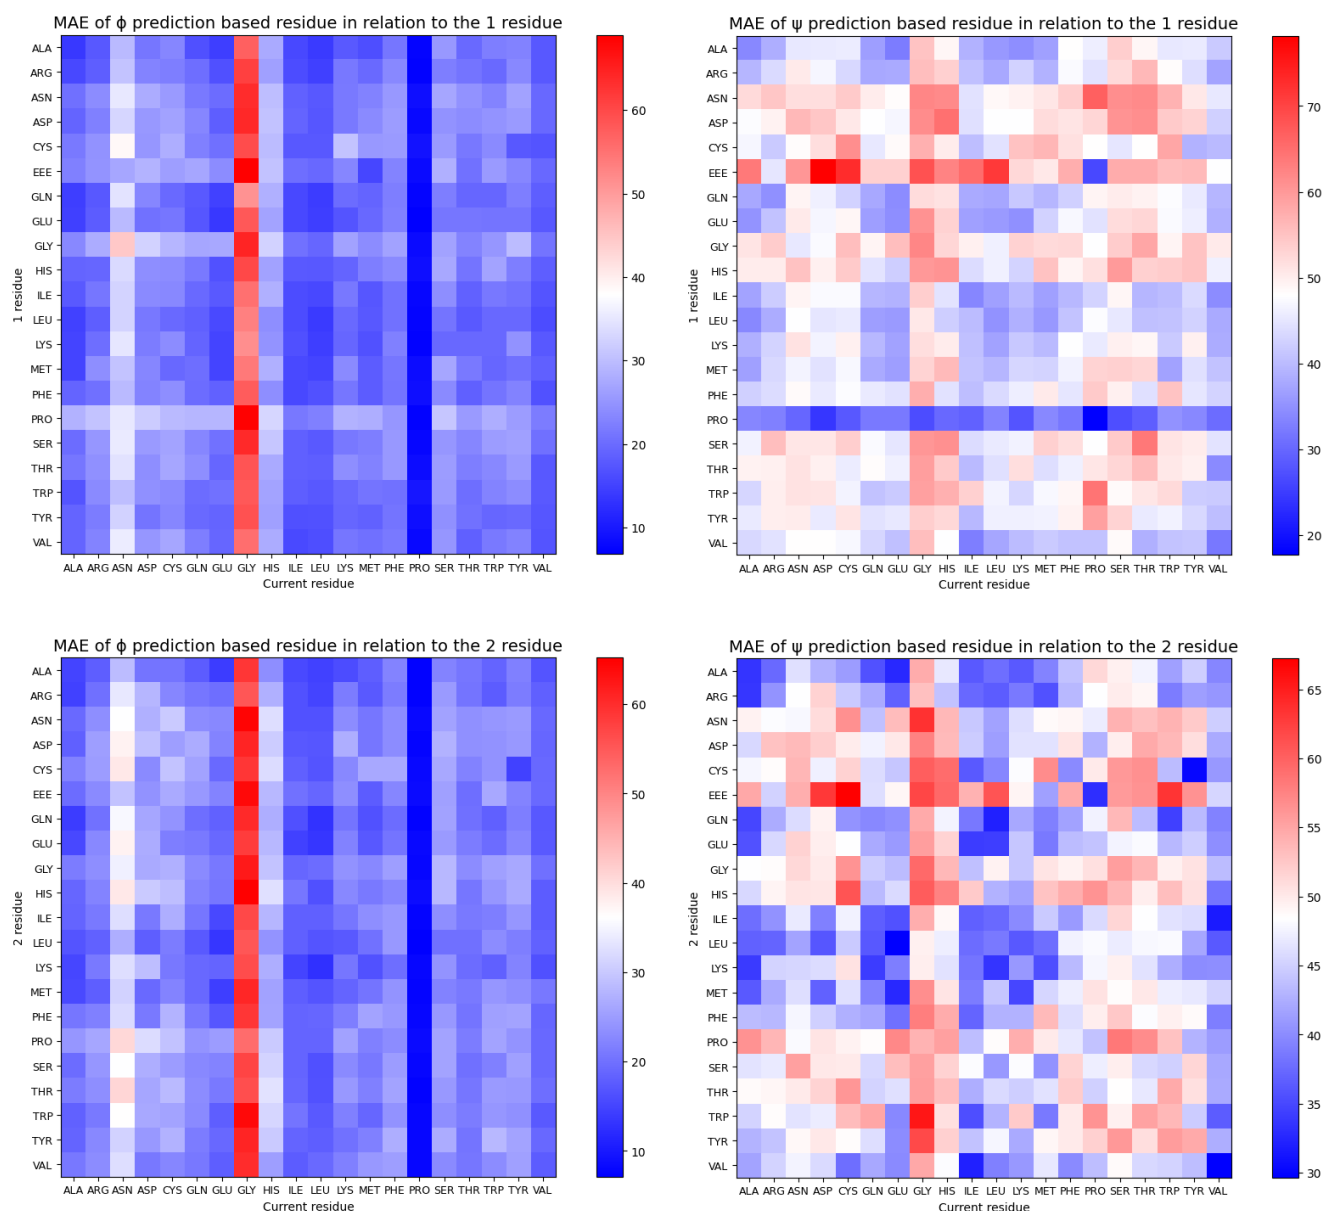

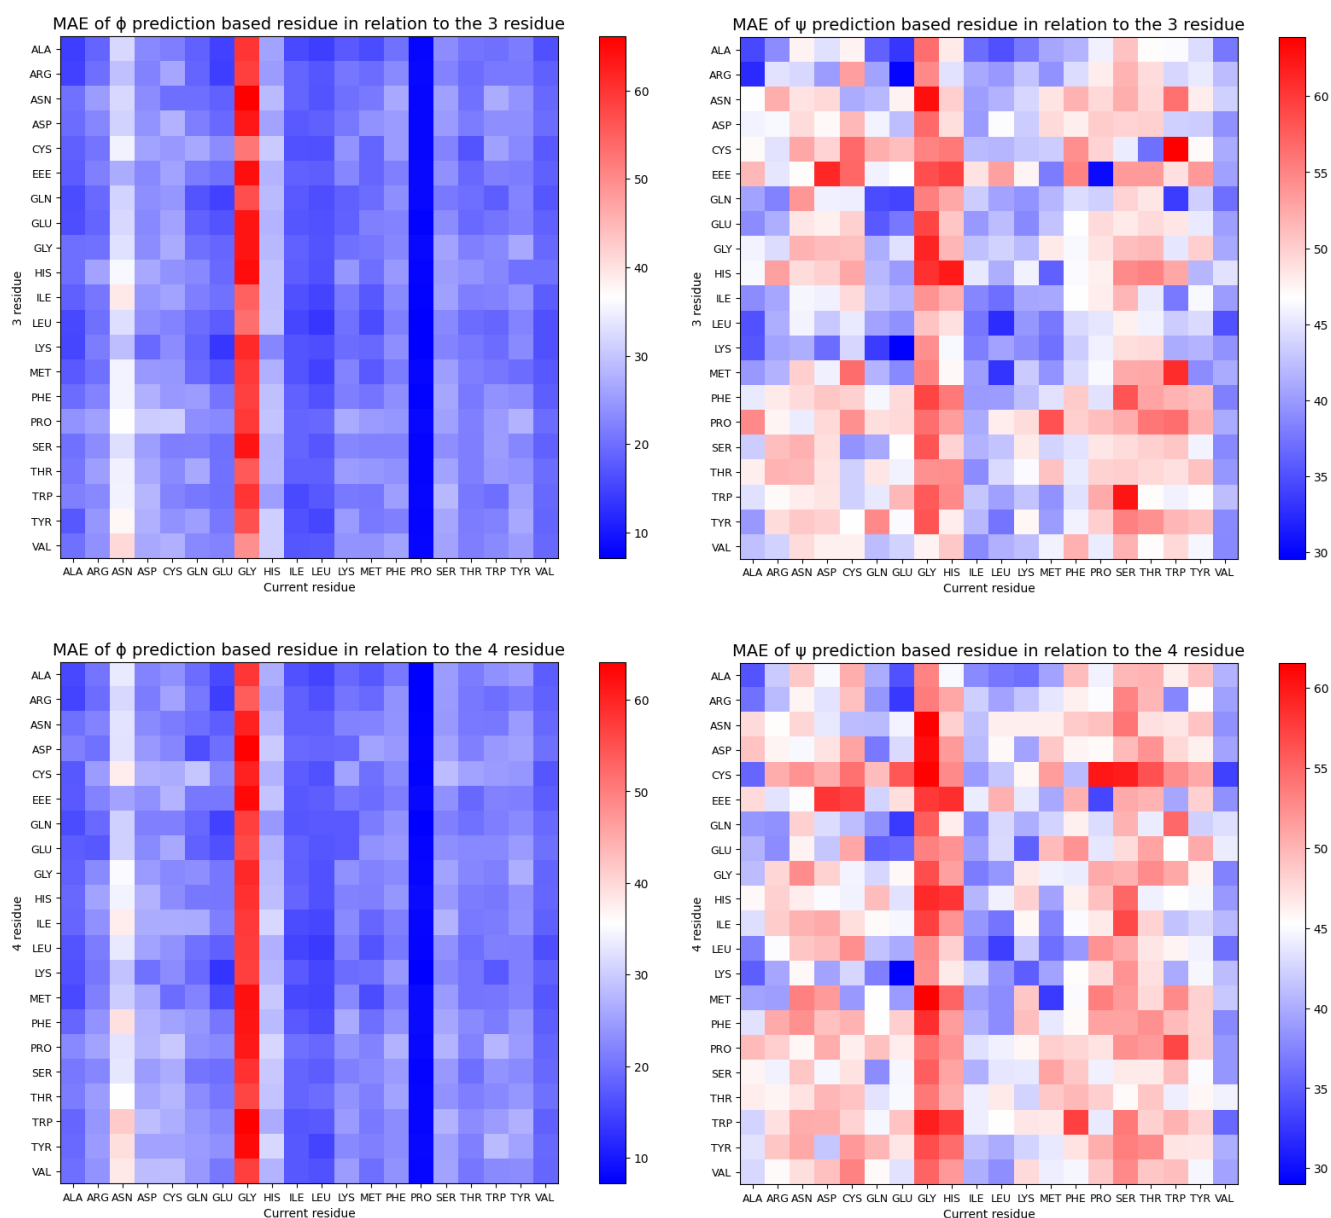



MAE of  $\phi$  prediction based residue in relation to the 5 residue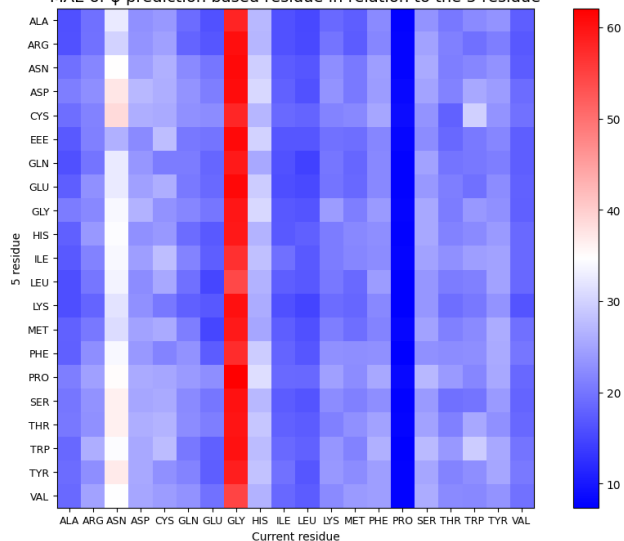MAE of  $\psi$  prediction based residue in relation to the 5 residue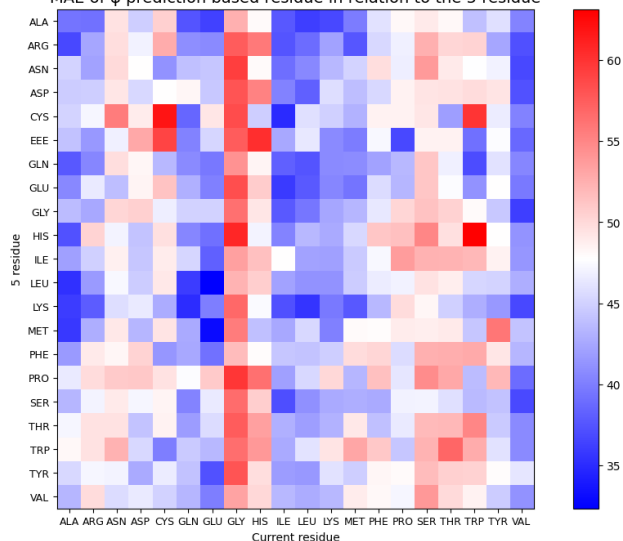MAE of  $\phi$  prediction based residue in relation to the 6 residue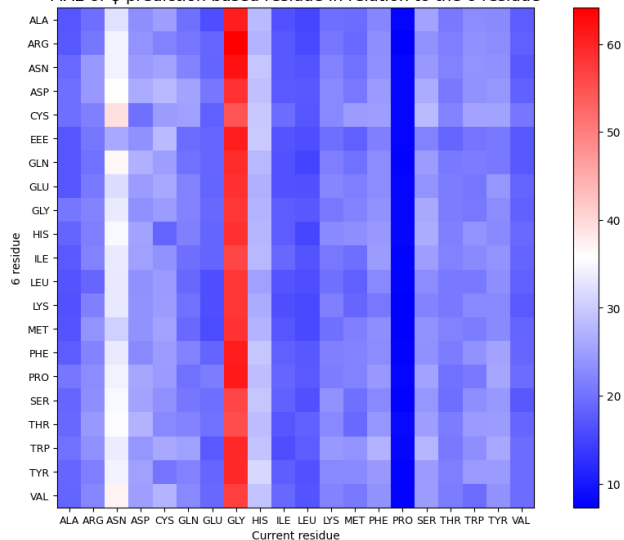MAE of  $\psi$  prediction based residue in relation to the 6 residue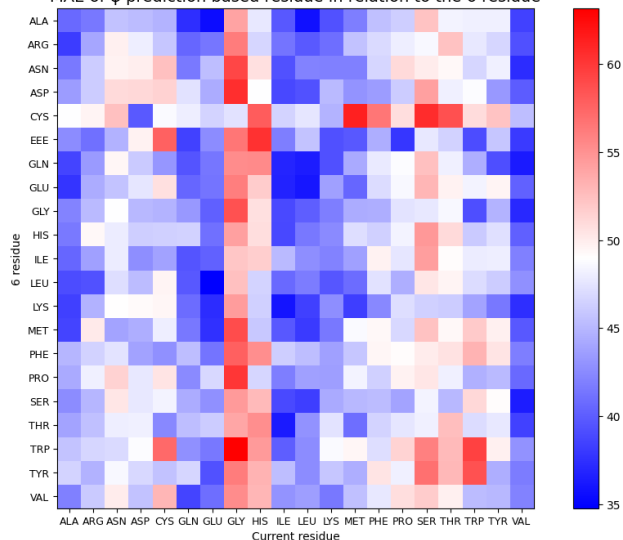

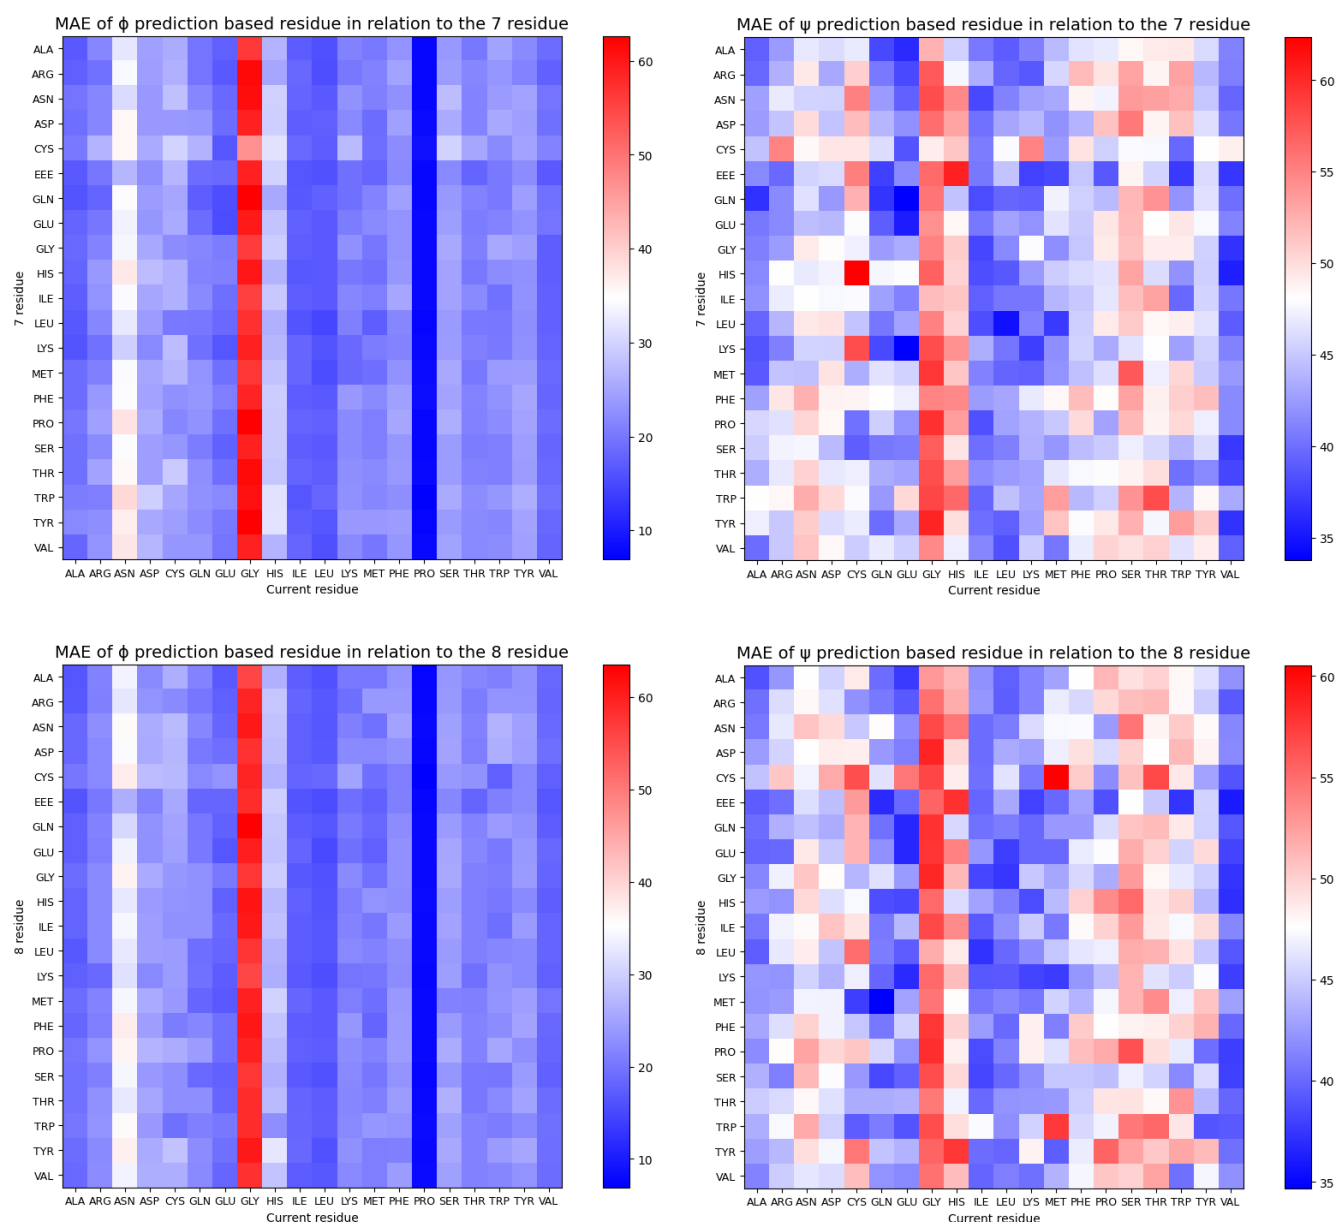

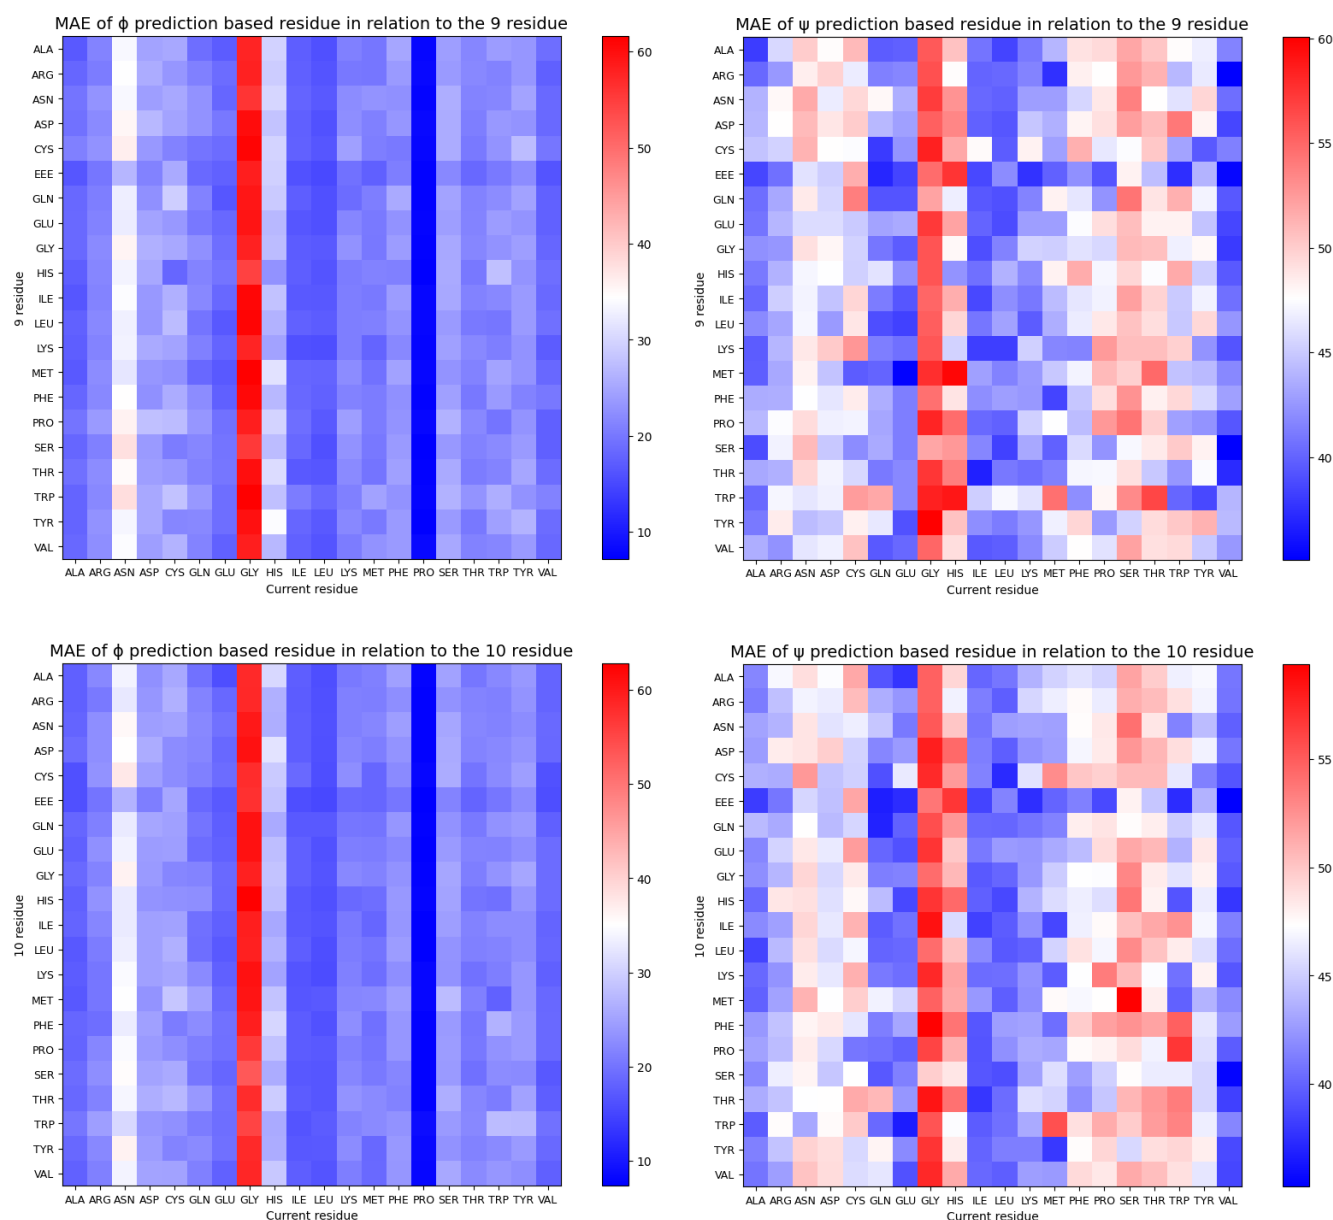

**Figure S2.** Mean absolute error of the current amino-acid residue in relation to the amino-acid residues at different positions of the sliding window for the  $\phi$  (left) and  $\psi$  (right) dihedral angles.

**Table S2.** Real and predicted amino acid conformational propensities of the test dataset.

|            | Real  |      |      | Predicted |      |      |
|------------|-------|------|------|-----------|------|------|
|            | Alpha | Beta | Coil | Alpha     | Beta | Coil |
| <b>Ala</b> | 4.48  | 2.97 | 0.90 | 4.71      | 2.75 | 0.90 |
| <b>Arg</b> | 2.21  | 2.02 | 0.65 | 2.25      | 1.96 | 0.67 |
| <b>Asn</b> | 1.44  | 1.93 | 0.98 | 1.05      | 2.11 | 1.18 |
| <b>Asp</b> | 2.15  | 2.51 | 1.18 | 1.98      | 2.28 | 1.57 |
| <b>Cys</b> | 0.40  | 0.78 | 0.17 | 0.35      | 0.85 | 0.16 |
| <b>Gln</b> | 1.72  | 1.44 | 0.50 | 1.70      | 1.40 | 0.56 |
| <b>Glu</b> | 3.45  | 2.14 | 0.85 | 3.60      | 1.95 | 0.89 |
| <b>Gly</b> | 1.34  | 1.54 | 4.70 | 1.20      | 1.21 | 5.17 |
| <b>His</b> | 0.78  | 1.14 | 0.39 | 0.68      | 1.17 | 0.46 |
| <b>Ile</b> | 2.24  | 3.09 | 0.30 | 2.02      | 3.40 | 0.20 |

|     |      |      |      |      |      |      |
|-----|------|------|------|------|------|------|
| Leu | 4.24 | 3.80 | 0.97 | 4.24 | 3.77 | 1.00 |
| Lys | 2.65 | 2.24 | 0.81 | 2.66 | 2.16 | 0.88 |
| Met | 0.94 | 0.88 | 0.23 | 0.93 | 0.89 | 0.22 |
| Phe | 1.39 | 2.14 | 0.47 | 1.33 | 2.25 | 0.42 |
| Pro | 1.25 | 2.72 | 0.65 | 0.97 | 2.98 | 0.66 |
| Ser | 1.91 | 3.14 | 1.21 | 1.85 | 3.15 | 1.26 |
| Thr | 1.55 | 3.15 | 0.96 | 1.45 | 3.41 | 0.79 |
| Trp | 0.59 | 0.77 | 0.18 | 0.56 | 0.81 | 0.16 |
| Tyr | 1.21 | 1.95 | 0.44 | 1.09 | 2.10 | 0.41 |
| Val | 2.39 | 4.40 | 0.42 | 2.14 | 4.79 | 0.28 |

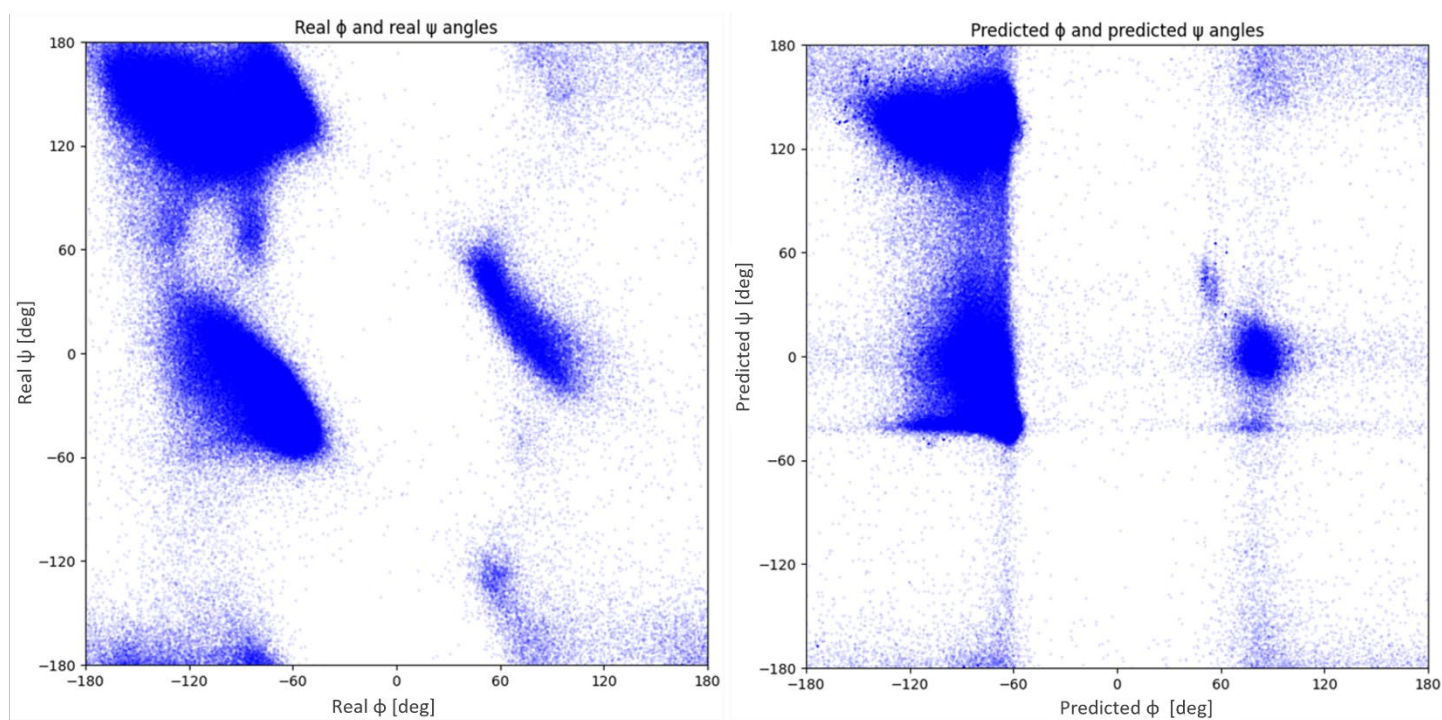

**Figure 3.** Ramachandran plots of actual and predicted dihedral angles.

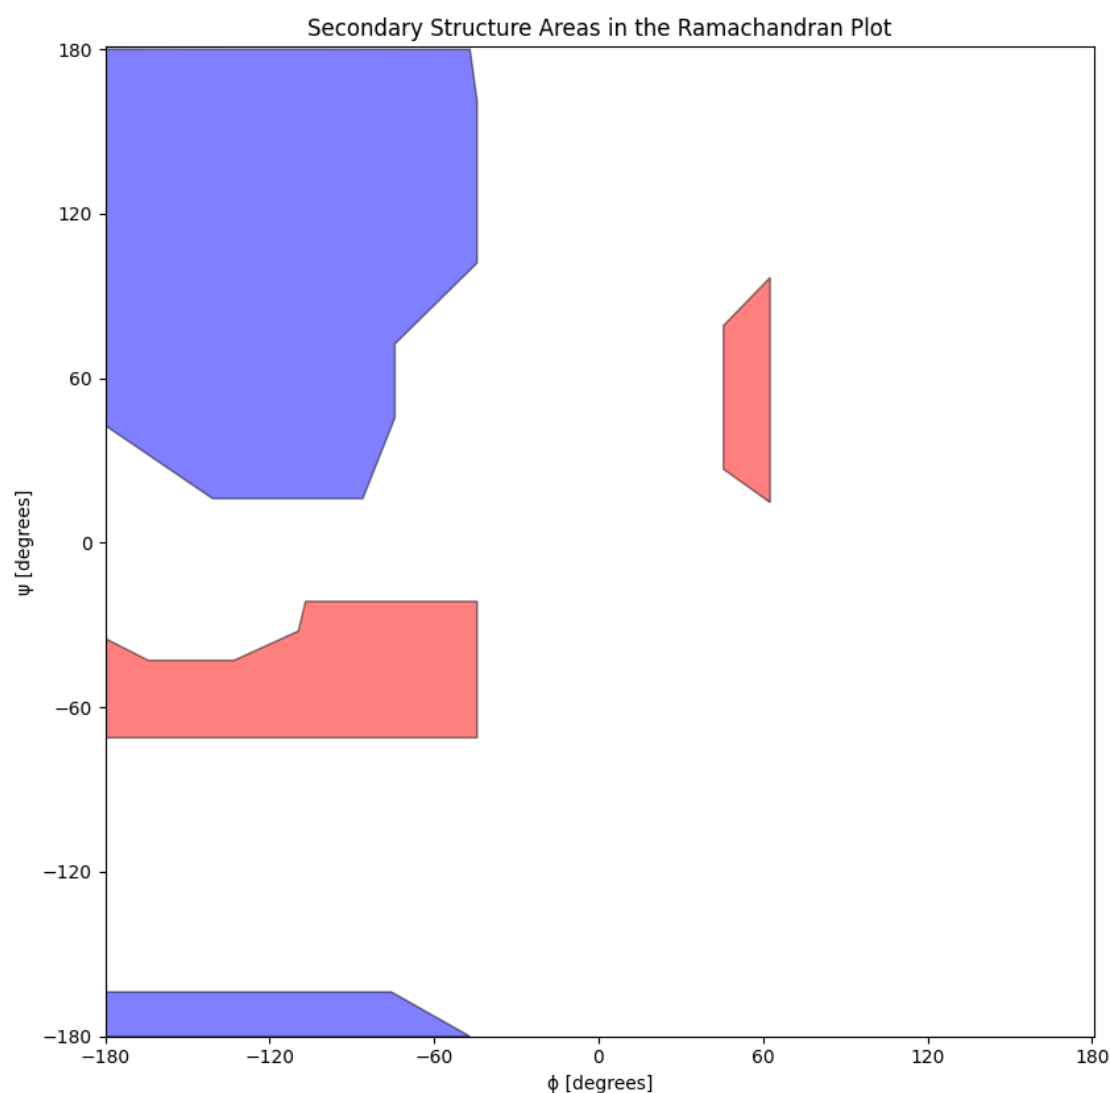

**Figure S4.** Secondary structure areas in the Ramachandran plot. The areas represent secondary structure elements: helices (red), sheets (purple), and undesignated (white). The areas are enclosed by the following points: helix = [(-180.0, -34.9), (-164.3, -42.9), (-133.0, -42.9), (-109.5, -32.2), (-106.9, -21.4), (-44.3, -21.4), (-44.3, -71.1), (-180.0, -71.1)] AND [(62.6, 14.7), (62.6, 96.7), (45.6, 79.2), (45.6, 26.8), (62.6, 14.7)]; sheet = [(-180.2, 42.9), (-140.8, 16.1), (-86.0, 16.1), (-74.3, 45.6), (-74.3, 72.5), (-44.3, 102.0), (-44.3, 161.1), (-46.9, 179.9), (-180, 180)] AND [(-180.0, -163.8), (-75.6, -163.8), (-46.9, -180.0), (-180.0, -180.0)].

Real and predicted  $\phi$  and  $\psi$  values for 1crn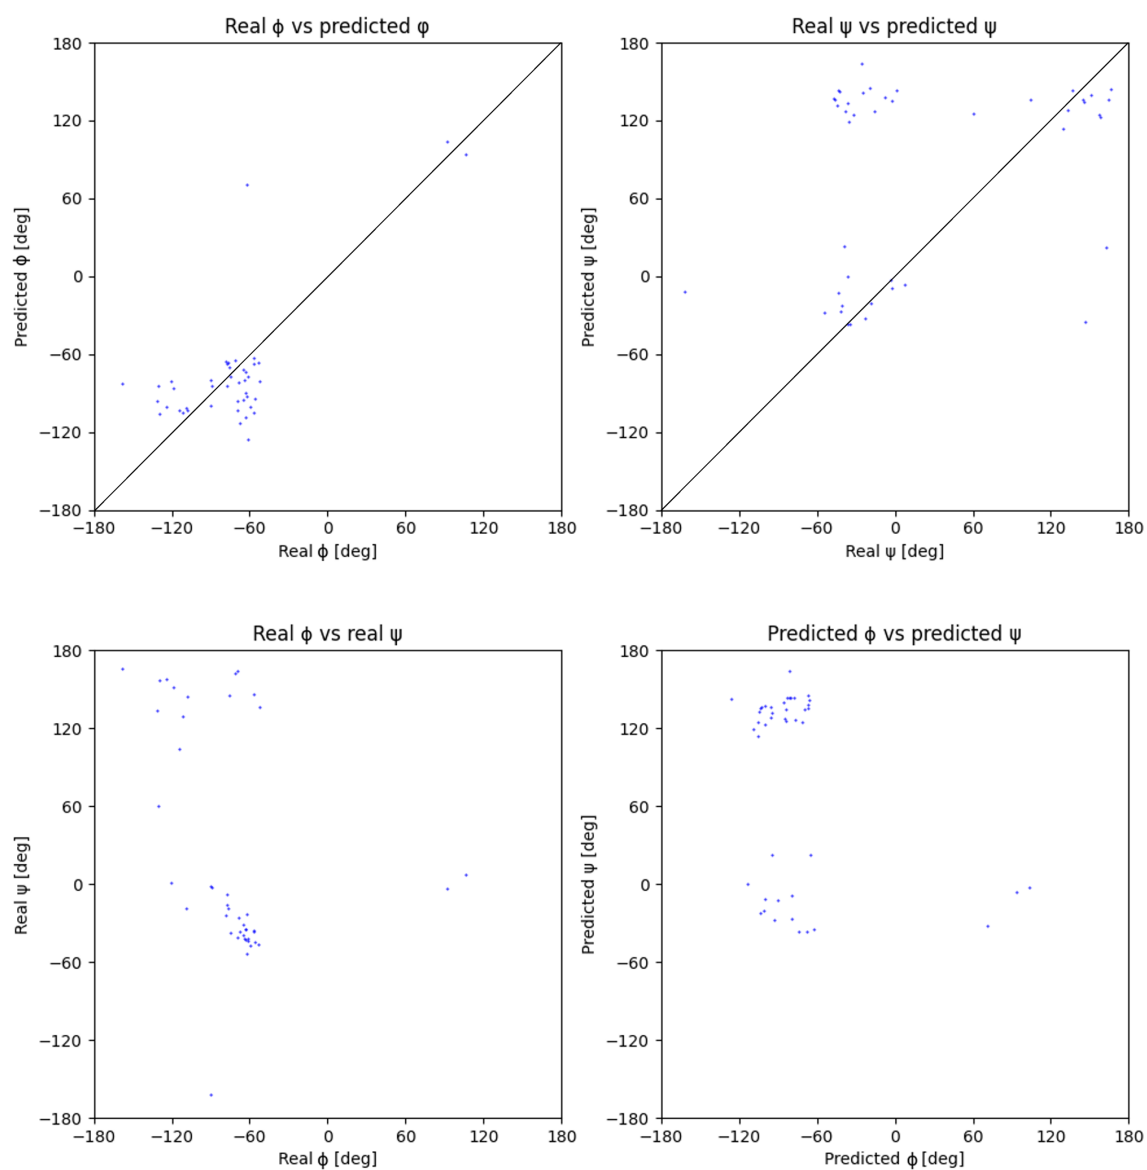

**Figure S5.** Real and predicted  $\phi$  and  $\psi$  angles for the protein structure PDB ID: 1CRN ( $\phi$  error =  $24.91^\circ$ ;  $\psi$  error =  $80.86^\circ$ ).

Real and predicted  $\phi$  and  $\psi$  values for 2fak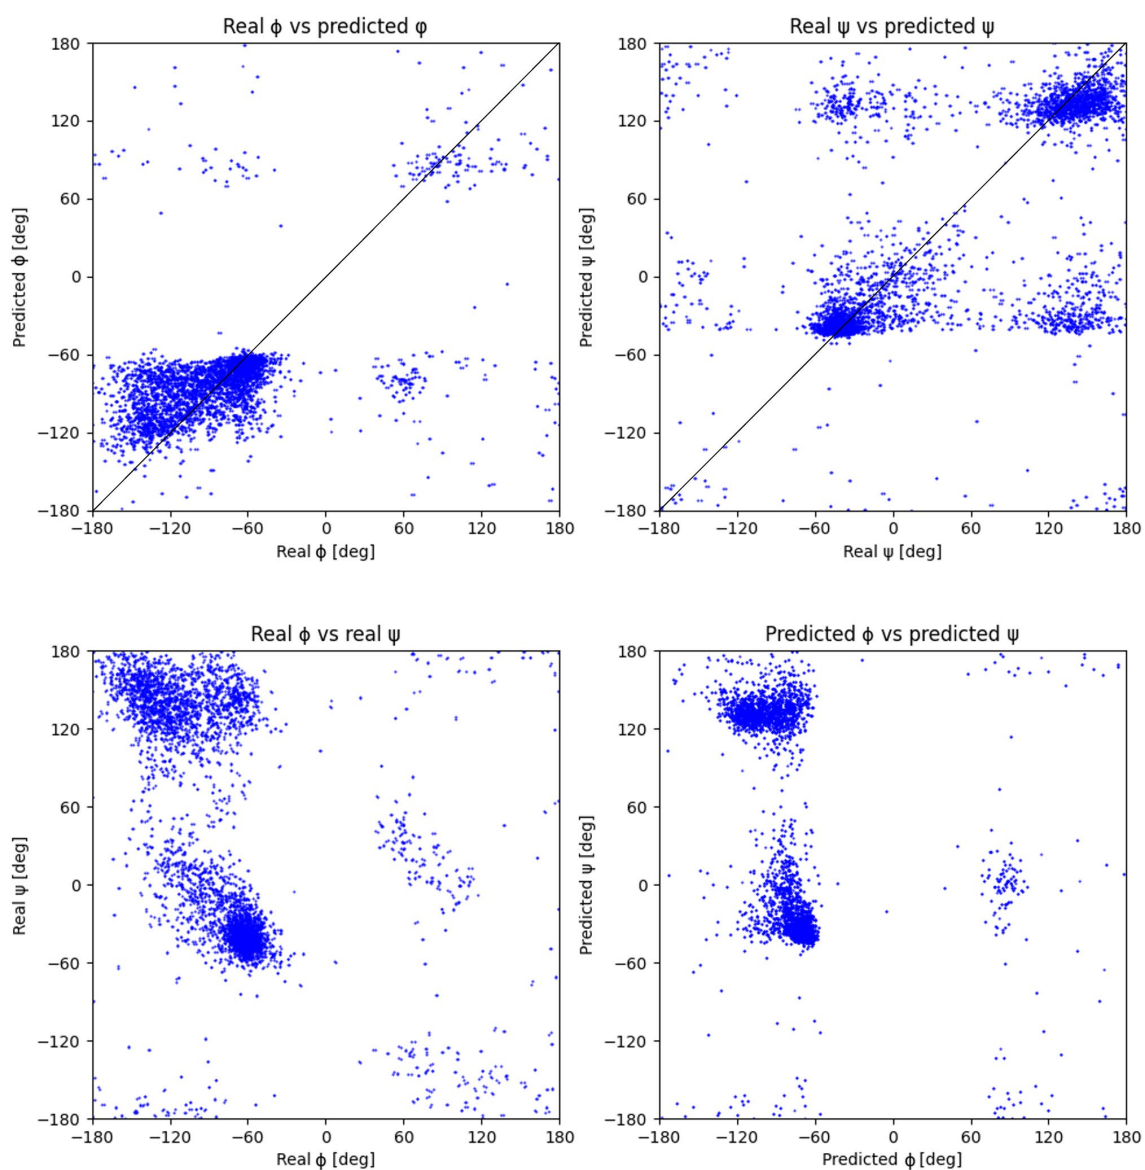

**Figure S6.** Real and predicted  $\phi$  and  $\psi$  angles for the protein structure PDB ID: 2FAK ( $\phi$  error = 25.71°;  $\psi$  error = 41.96°).

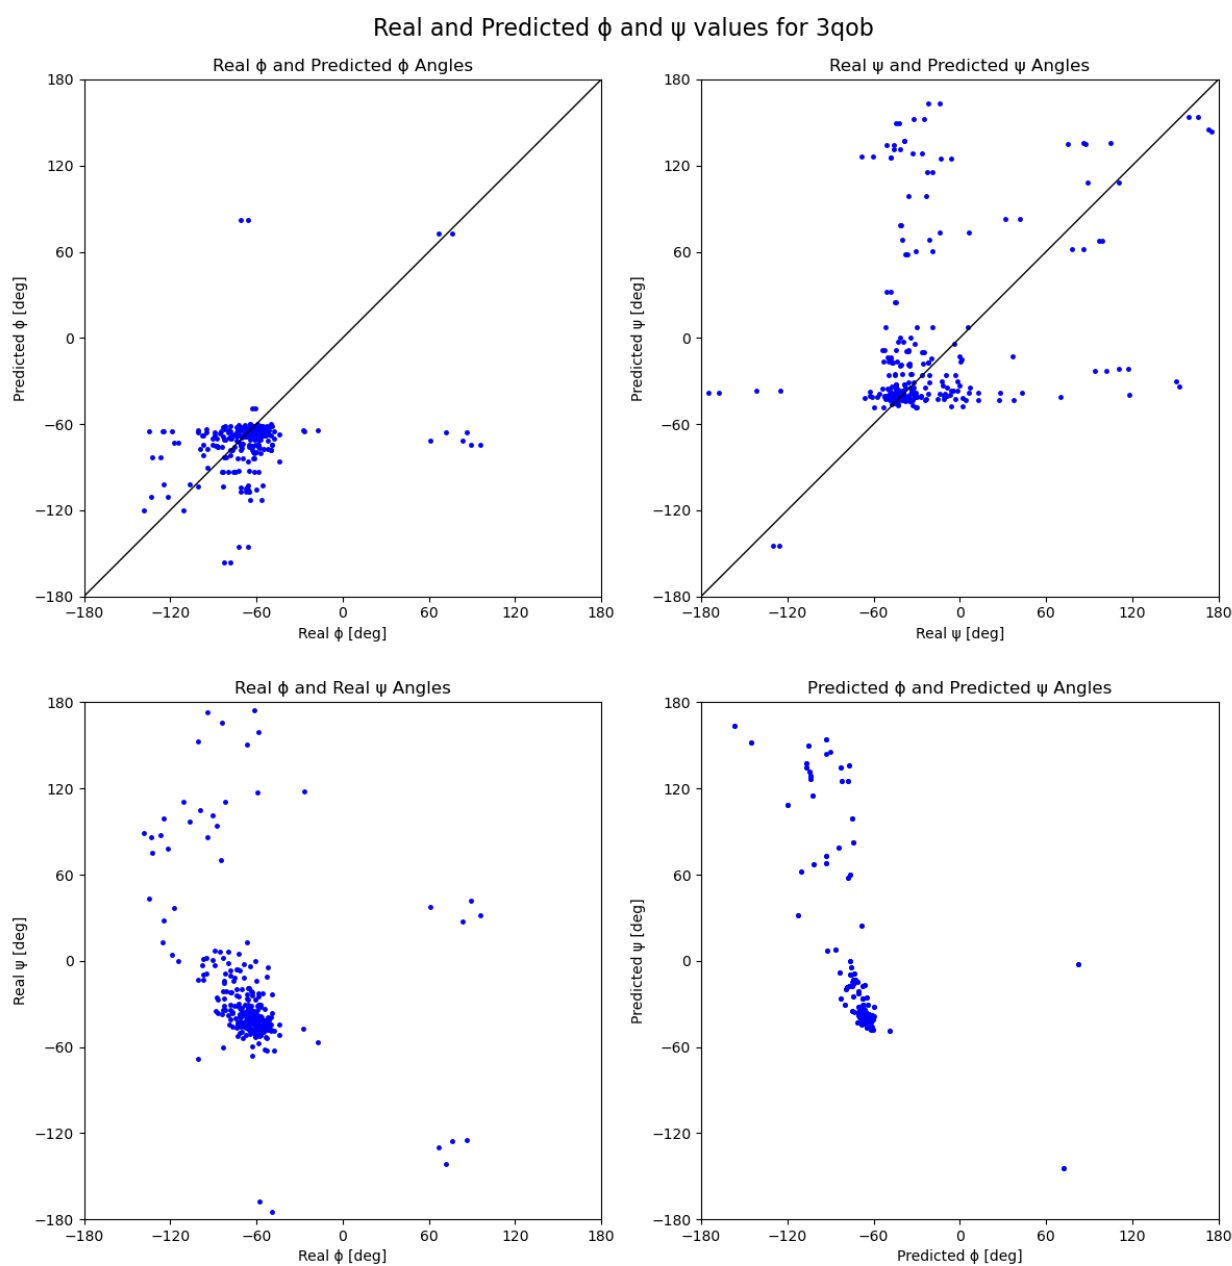

**Figure S7.** Real and predicted  $\phi$  and  $\psi$  angles for the protein structure PDB ID: 3QOB ( $\phi$  error =  $17.76^\circ$ ;  $\psi$  error =  $36.43^\circ$ ).



Real and predicted  $\phi$  and  $\psi$  values for 4duh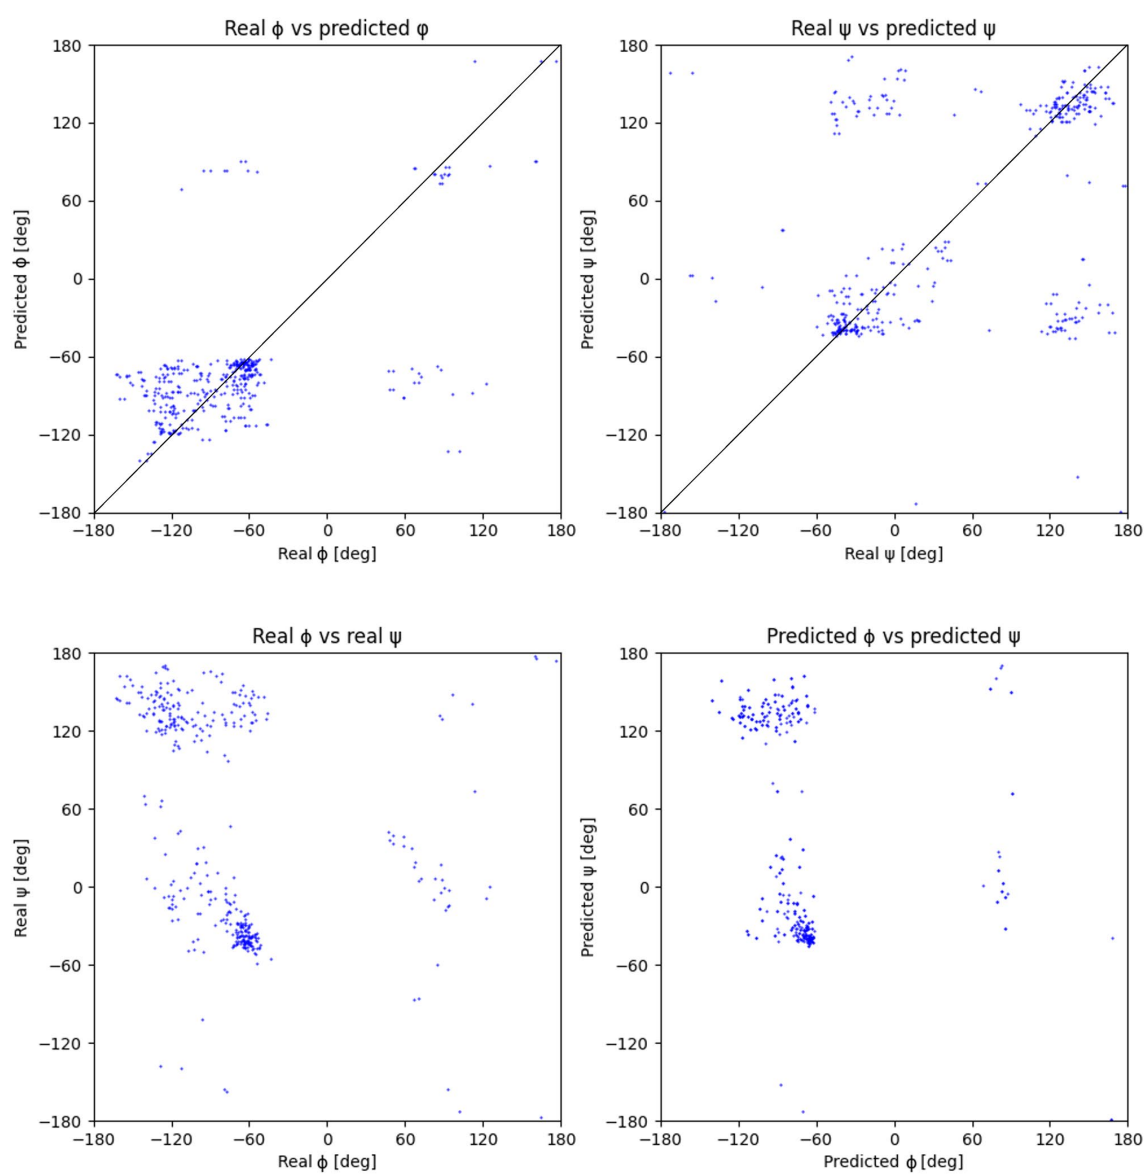

**Figure S8.** Real and predicted  $\phi$  and  $\psi$  angles for the protein structure PDB ID: 4DUH ( $\phi$  error = 29.86°;  $\psi$  error = 48.16°).

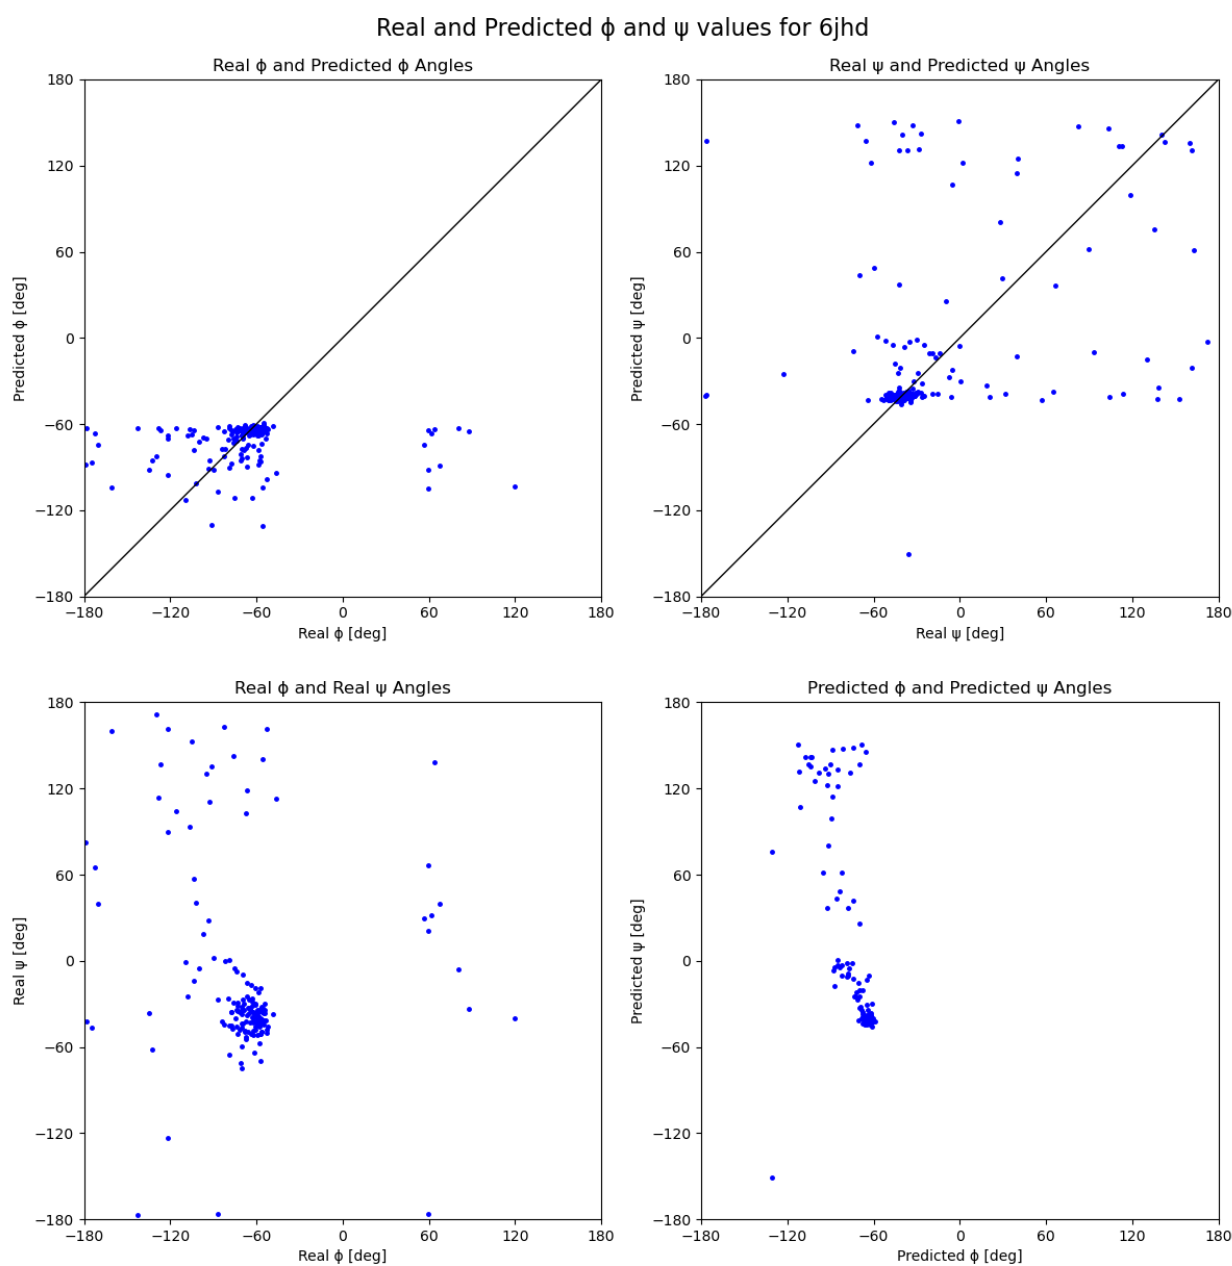

**Figure S9.** Real and predicted  $\phi$  and  $\psi$  angles for the protein structure PDB ID: 6JHD ( $\phi$  error =  $24.57^\circ$ ;  $\psi$  error =  $39.91^\circ$ ).

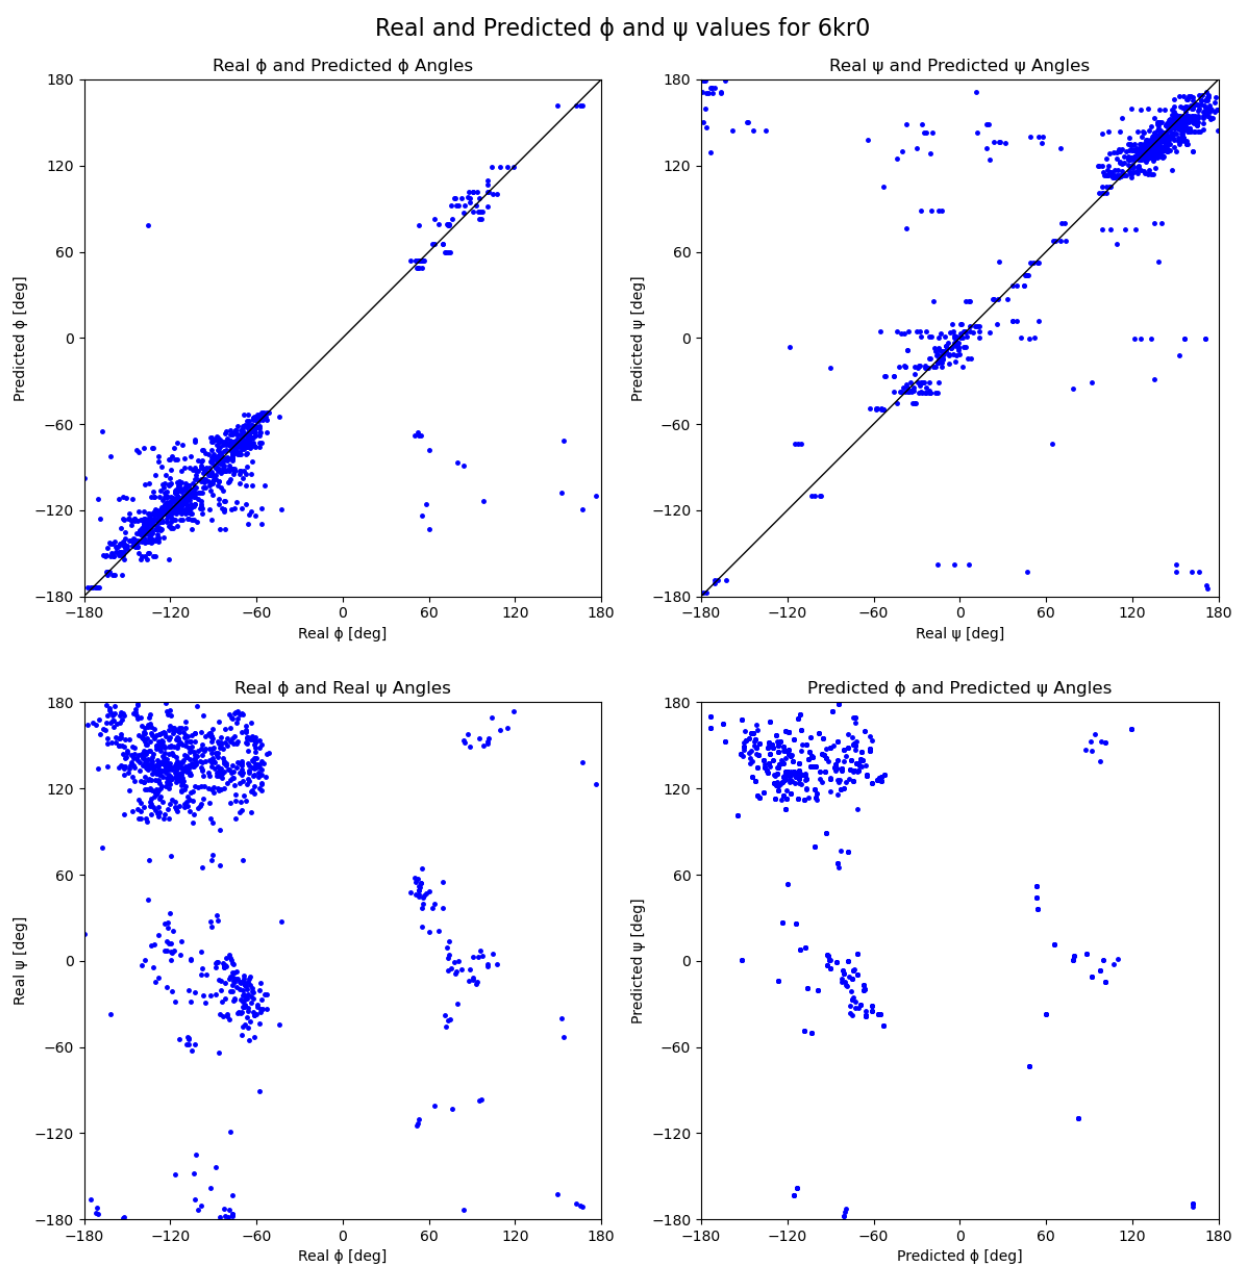

**Figure S10.** Real and predicted  $\phi$  and  $\psi$  angles for the protein structure PDB ID: 6KR0 ( $\phi$  error =  $12.27^\circ$ ;  $\psi$  error =  $16.10^\circ$ ).

Real and predicted  $\phi$  and  $\psi$  values for 6kwy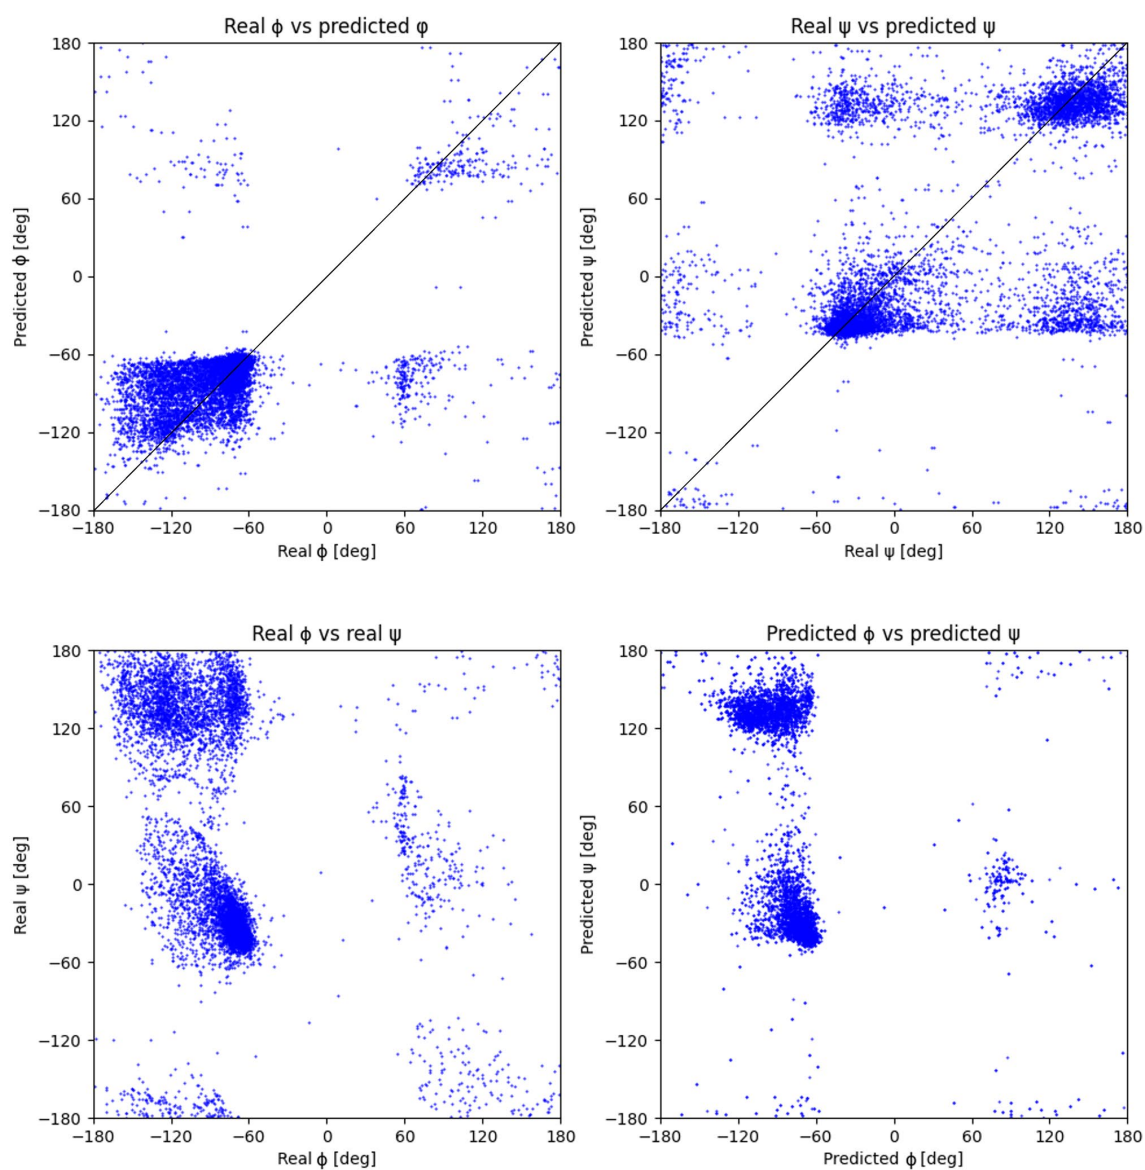

**Figure S11.** Real and predicted  $\phi$  and  $\psi$  angles for the protein structure PDB ID: 6KWY ( $\phi$  error = 22.78°;  $\psi$  error = 42.43°).

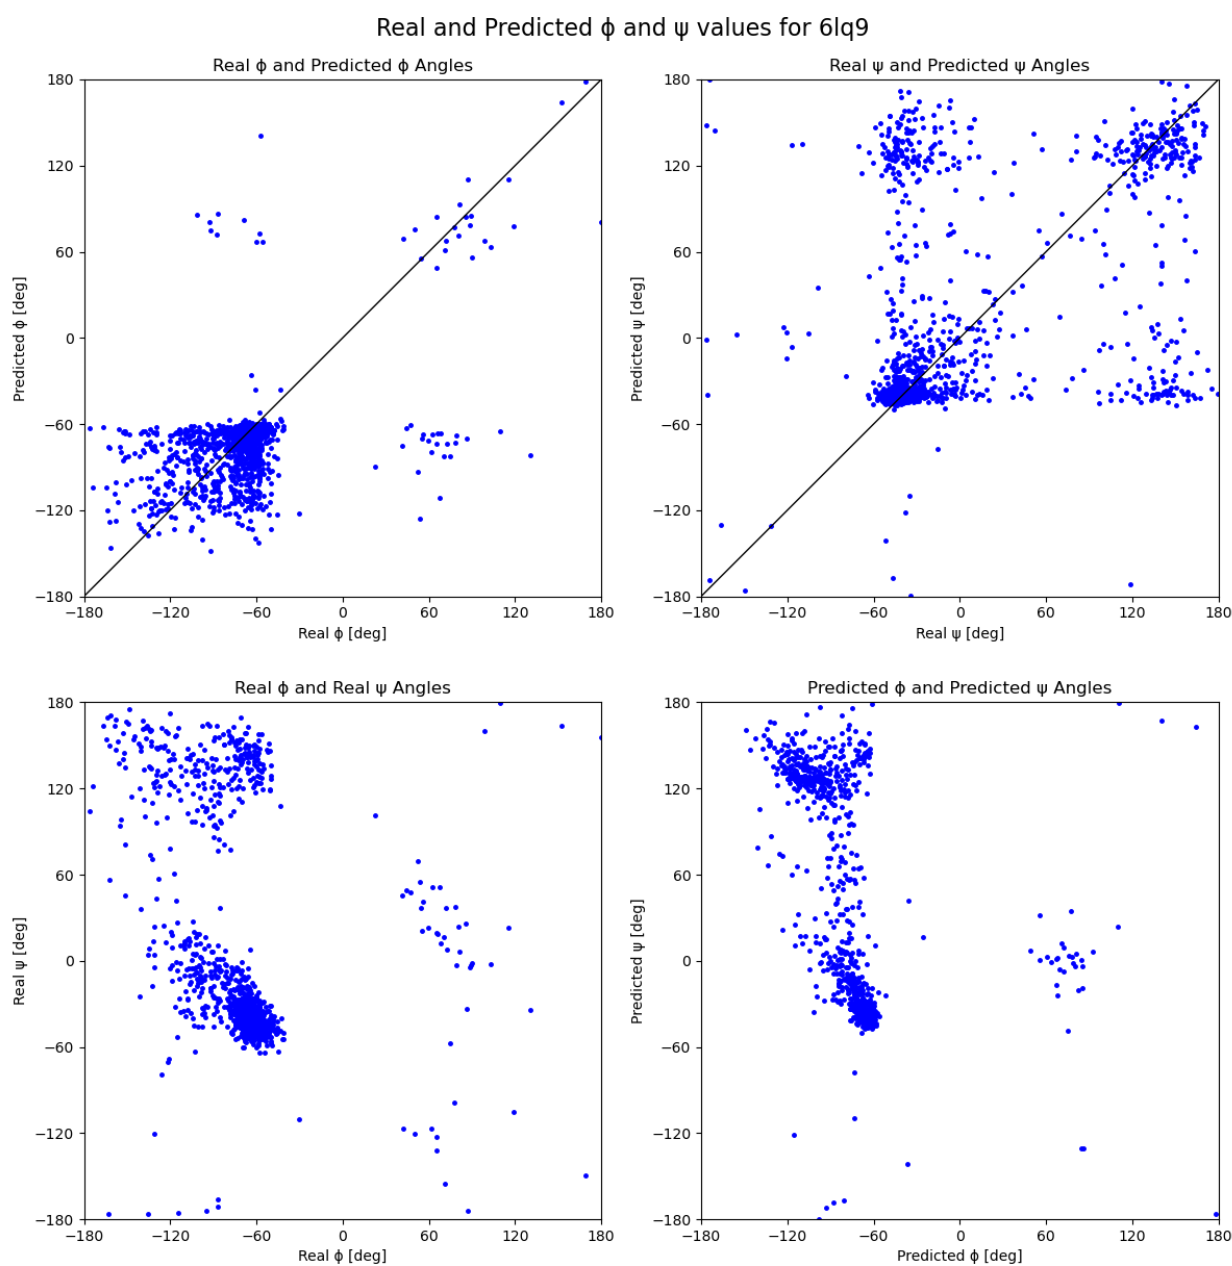

**Figure S12.** Real and predicted  $\phi$  and  $\psi$  angles for the protein structure PDB ID: 6LQ9 ( $\phi$  error =  $18.83^\circ$ ;  $\psi$  error =  $40.67^\circ$ ).

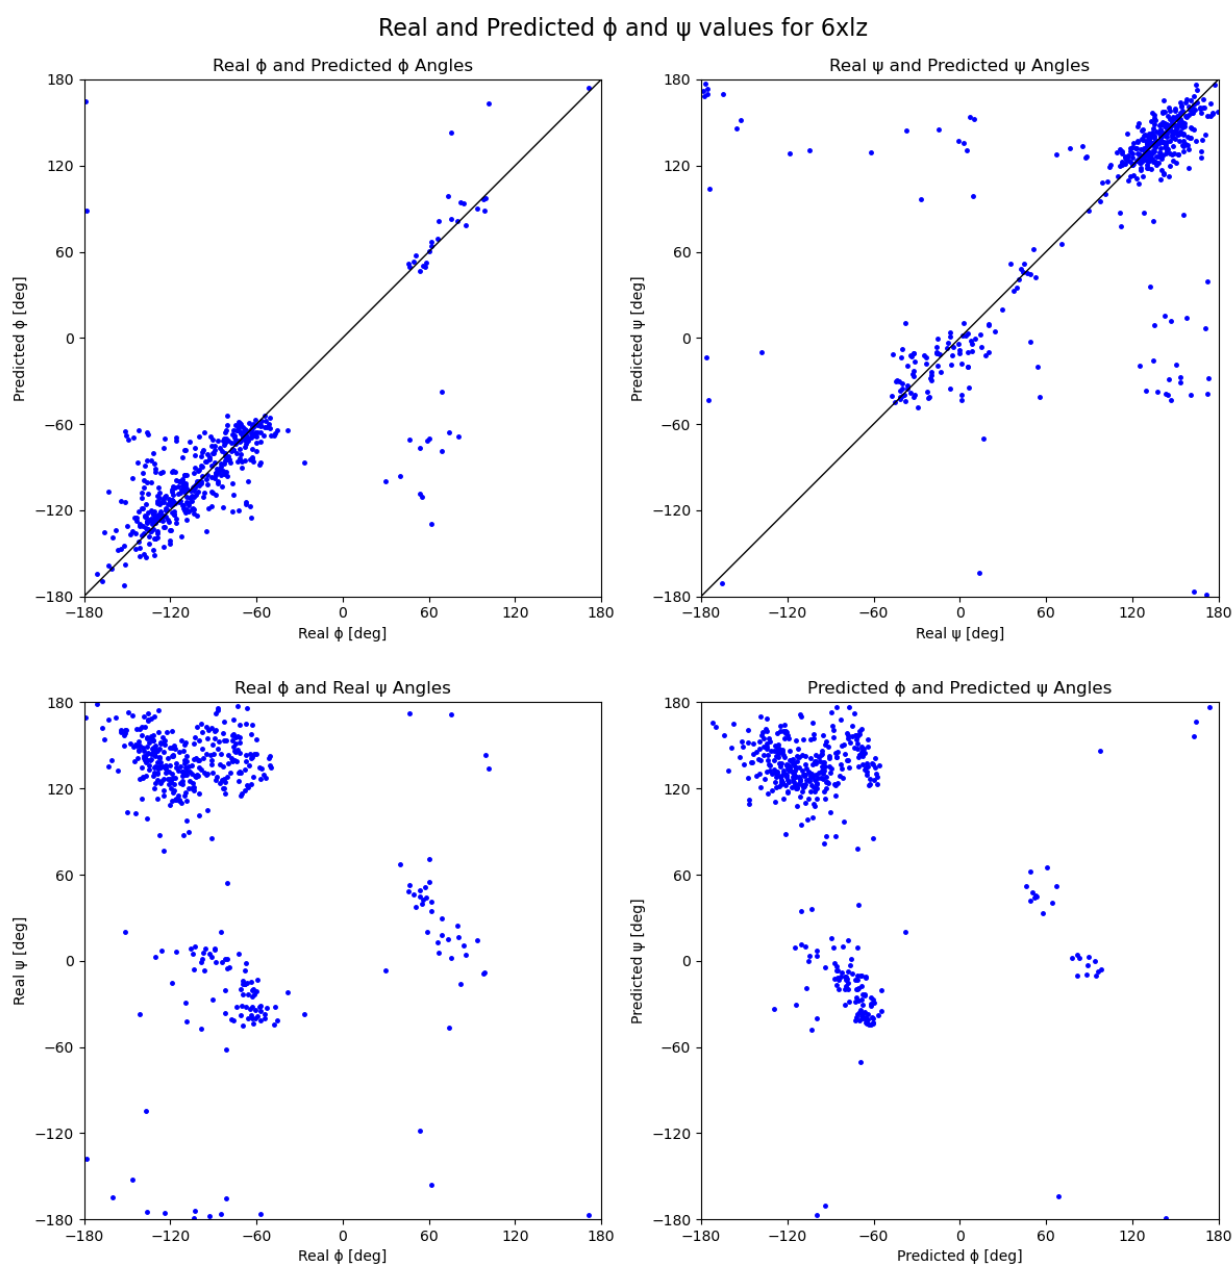

**Figure S13.** Real and predicted  $\phi$  and  $\psi$  angles for the protein structure PDB ID: 6XLZ ( $\phi$  error =  $17.45^\circ$ ;  $\psi$  error =  $23.29^\circ$ ).

Real and predicted  $\phi$  and  $\psi$  values for MnSOD\_ALA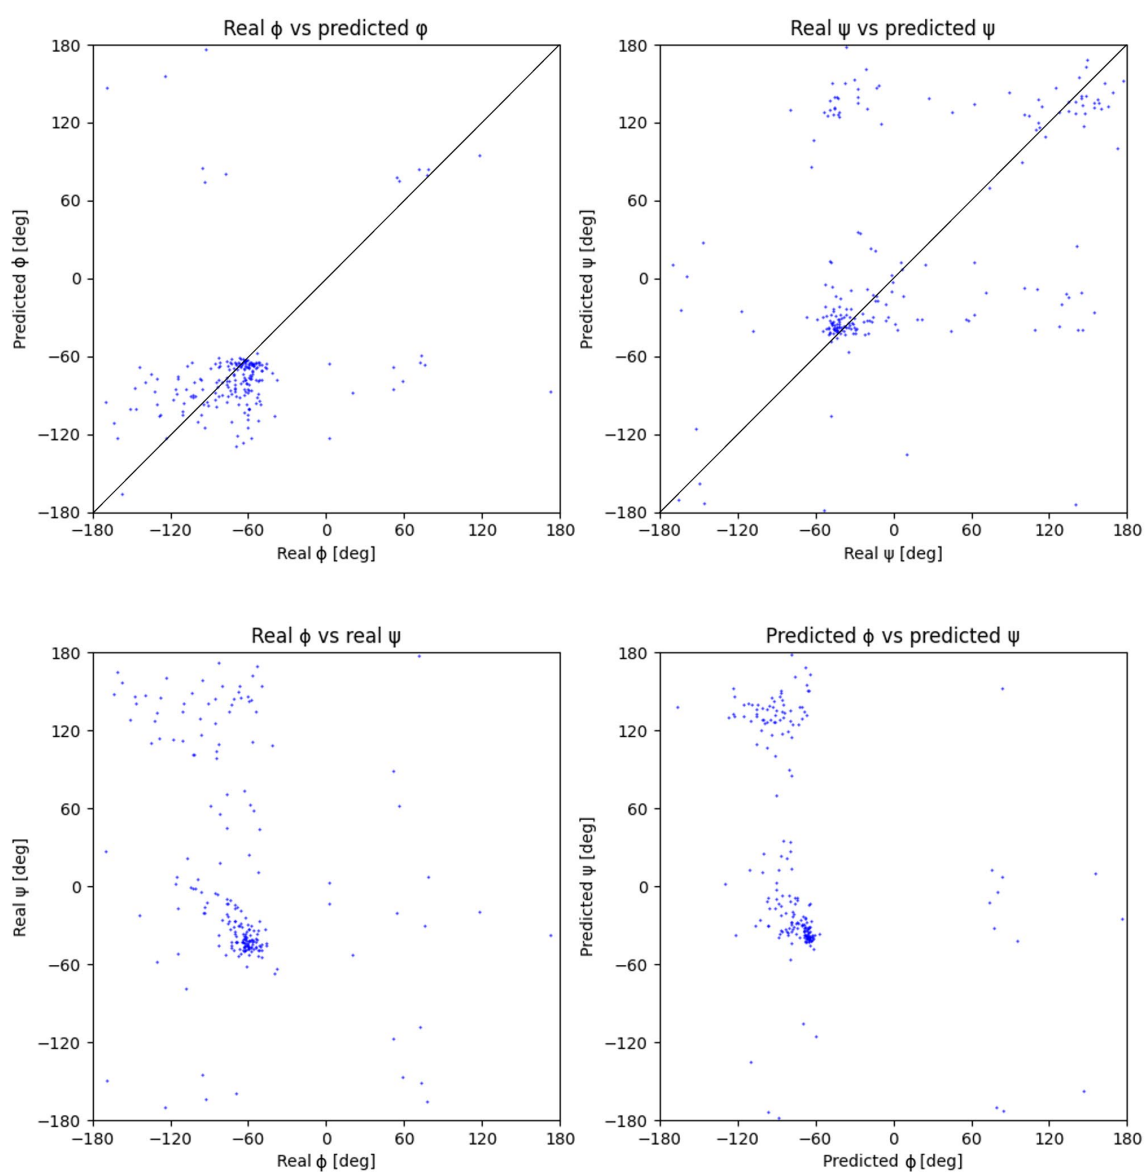

**Figure S14.** Real and predicted  $\phi$  and  $\psi$  angles for the protein structure of MnSOD\_ALA ( $\phi$  error =  $26.82^\circ$ ;  $\psi$  error =  $51.12^\circ$ ).

Real and predicted  $\phi$  and  $\psi$  values for MnSOD\_VAL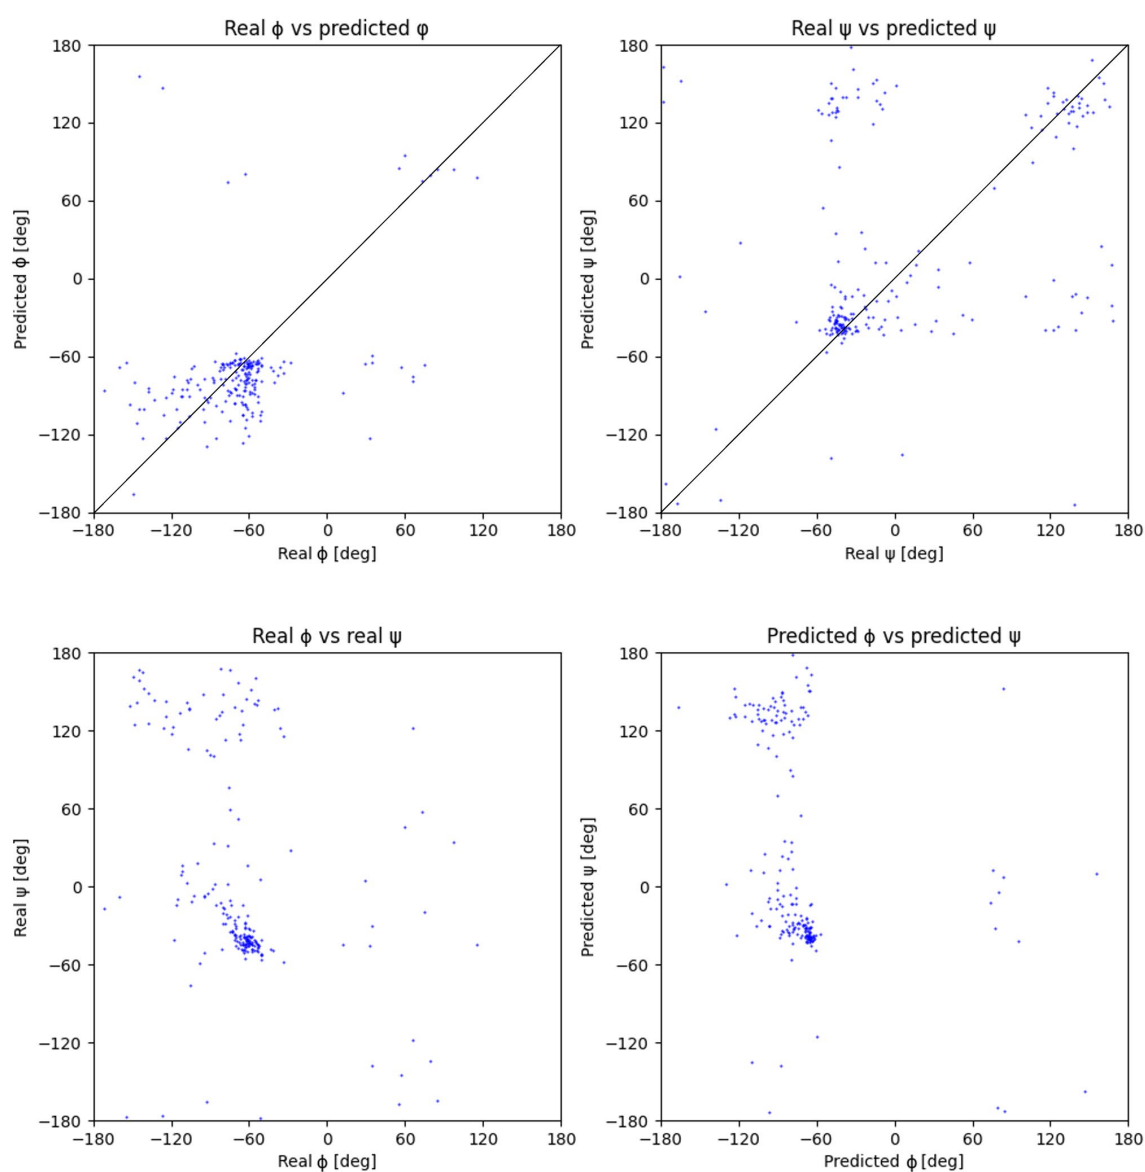

**Figure S15.** Real and predicted  $\phi$  and  $\psi$  angles for the protein structure of MnSOD\_VAL ( $\phi$  error =  $26.41^\circ$ ;  $\psi$  error =  $50.44^\circ$ ).

**Table S3.** Per-model mean absolute errors of the predicted phi and psi dihedral angle of our model compared to an online tool DISSpred.

| PDB ID | Our model |       | DISSpred |       |
|--------|-----------|-------|----------|-------|
|        | Phi       | Psi   | Phi      | Psi   |
| 1CRN   | 22.63     | 77.65 | 32.70    | 49.86 |
| 2FAK   | 20.58     | 35.08 | 29.85    | 35.77 |
| 4DUH   | 28.65     | 54.18 | 42.60    | 85.49 |
| 6KWY   | 26.19     | 44.18 | 43.28    | 91.98 |
| 6JHD   | 24.57     | 39.90 | 25.76    | 34.35 |
| 6KR0   | 12.24     | 16.70 | 47.25    | 90.02 |
| 6LQ9   | 26.57     | 48.82 | 37.57    | 73.66 |
| 3QOB   | 18.12     | 37.80 | 19.94    | 32.03 |



|                  |              |              |              |              |
|------------------|--------------|--------------|--------------|--------------|
| <b>6XLZ</b>      | 16.59        | 27.03        | 43.40        | 81.24        |
| <b>MnSOD-ALA</b> | 26.69        | 50.94        | 31.06        | 60.28        |
| <b>MnSOD-VAL</b> | 27.65        | 50.16        | 31.99        | 58.17        |
| <b>Average</b>   | <b>22.77</b> | <b>43.86</b> | <b>35.03</b> | <b>62.99</b> |

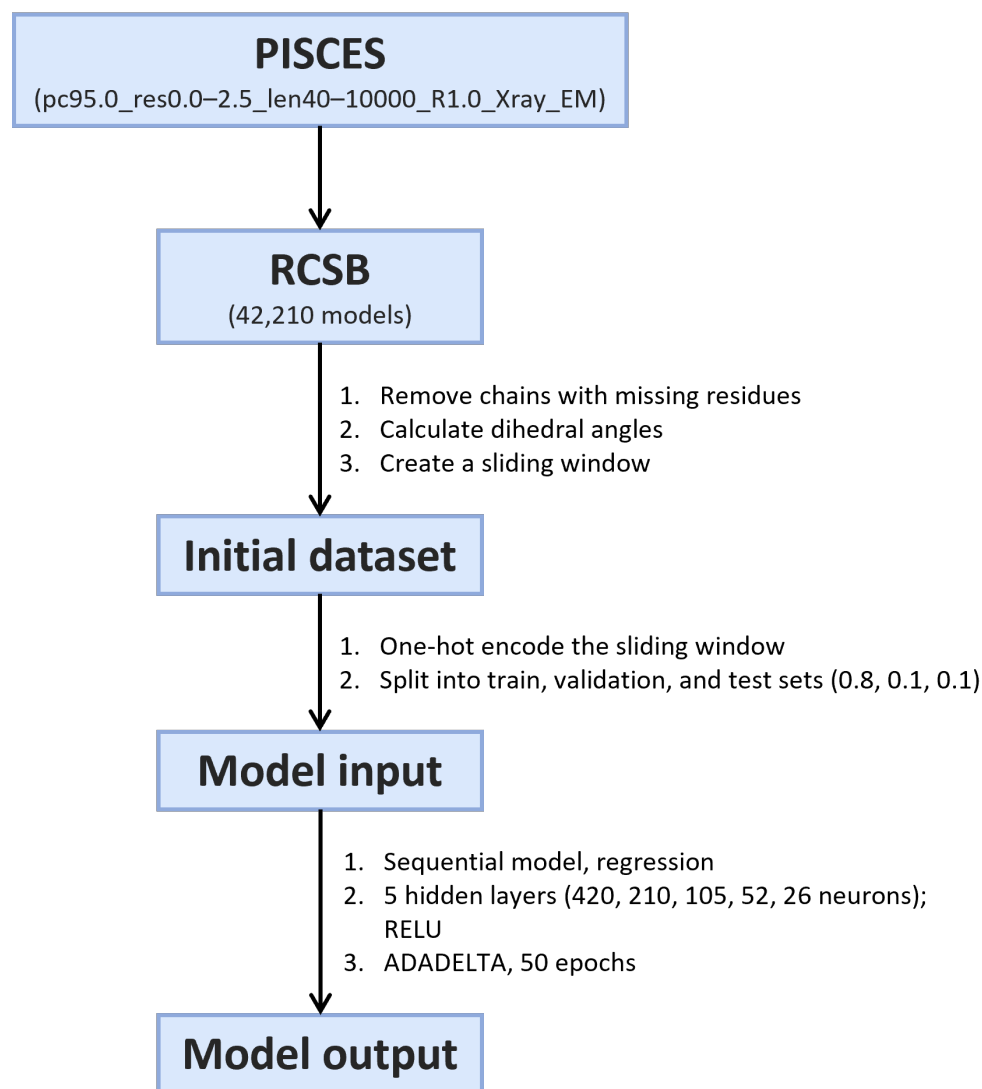

**Figure S16.** The process of generating output, which involves accessing the PISCES and RCSB datasets, converting the coordinates to dihedral angles, and transforming the sequence into a sliding window format.

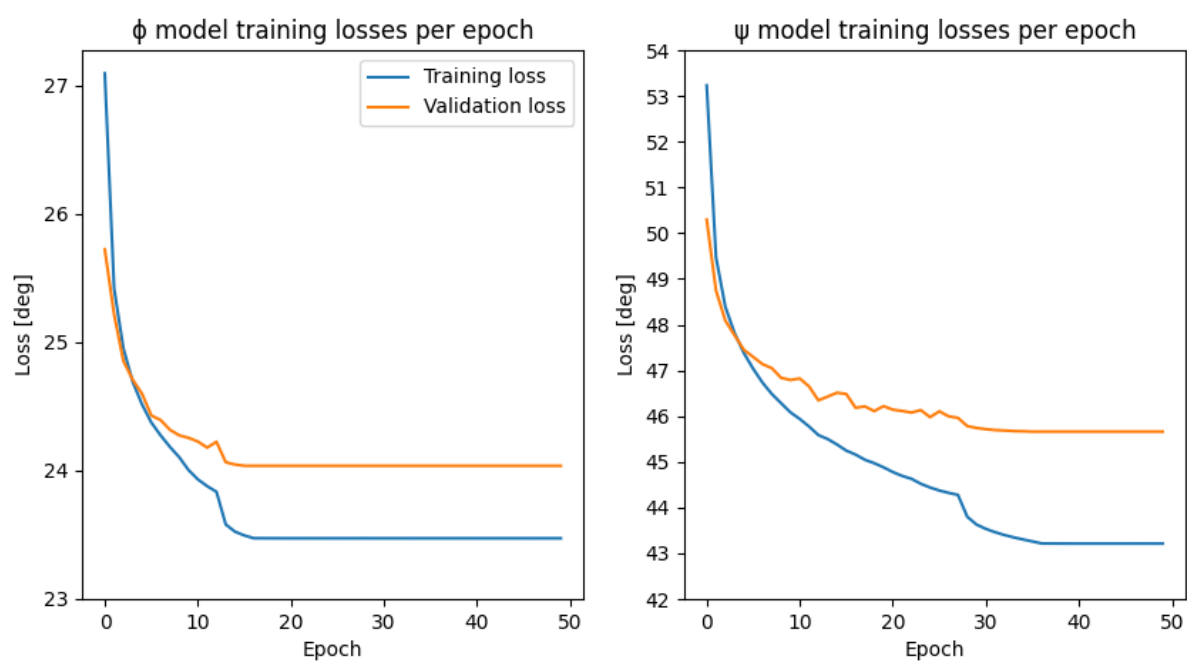

**Figure S17.** Training and validation loss function values during the  $\phi$  and  $\psi$  model training.
